1           **Rab35 Governs Apicobasal Polarity Through Regulation of Actin Dynamics During**  
2                                               **Sprouting Angiogenesis**

3  
4  
5                           Caitlin R. Francis<sup>1</sup>, Hayle Kincross<sup>1</sup>, and Erich J. Kushner<sup>1\*</sup>

6  
7  
8                           <sup>1</sup>Department of Biological Sciences, University of Denver, Denver, CO

9  
10  
11  
12                   \*Author for correspondence:           Erich J. Kushner  
13                                                                         University of Denver  
14                                                                         Department of Biological Sciences  
15                                                                         Denver, CO 80210  
16                                                                         Phone: 303-871-4386  
17                                                                         Email: Erich.Kushner@du.edu  
18  
19  
20

21       **Abstract:** 179 words

22  
23       **Manuscript:** 5,337 words (excluding methods, citations, figure legends)

24  
25       **Figures:** 7

26  
27       **Supplemental Materials:** 8 figures, 1 table

28  
29       **Running Title:** Rab35 Governs Angiogenic Polarity Programs

30  
31       **Keywords:** angiogenesis, lumenogenesis, blood vessel development, actin, Rab35, DENNd1c,  
32 trafficking, apical membrane, cytoskeleton, zebrafish

33  
34

35 **ABSTRACT**

36 In early blood vessel development, trafficking programs, such as those using Rab GTPases, are  
37 tasked with delivering vesicular cargo with high spatiotemporal accuracy. However, the function  
38 of many Rab trafficking proteins remain ill-defined in endothelial tissue; therefore, their relevance  
39 to blood vessel development is unknown. Rab35 has been shown to play an enigmatic role in  
40 cellular behaviors which differs greatly between tissue-type and organism. Importantly, Rab35  
41 has never been characterized for its potential contribution in sprouting angiogenesis; thus, our  
42 goal was to map Rab35's primary function in angiogenesis. Our results demonstrate that Rab35  
43 is critical for sprout formation; in its absence apicobasal polarity is entirely lost in vitro and in vivo.  
44 To determine mechanism, we systematically explored established Rab35 effectors and show that  
45 none are operative in endothelial cells. However, we find that Rab35 partners with DENNd1c, an  
46 evolutionarily divergent guanine exchange factor, to localize to actin. Here, Rab35 regulates actin  
47 polymerization, which is required to setup proper apicobasal polarity during sprout formation. Our  
48 findings establish that Rab35 is a potent regulator of actin architecture during blood vessel  
49 development.

## 50 INTRODUCTION

51           Angiogenesis is the process of sprouting and growth of new blood vessels from preexisting  
52 ones and is the primary driver of network expansion [1-4]. Many extrinsic and intrinsic biological  
53 systems have been shown to affect endothelial biology and, by extension, blood vessel formation.  
54 Membrane trafficking is one such system that is less well-characterized in endothelial tissue, but  
55 has recently become more appreciated as additional organotypic trafficking signatures are aligned  
56 with important endothelial behaviors [5-8]. Membrane trafficking refers to vesicular transport of  
57 protein(s) to, or in vicinity of, the plasma membrane [9-11]. Here, trafficking regulators, such as  
58 Rab GTPases, interface with a host of effectors involved in receptor recycling, cytoskeletal  
59 regulation, shunting to degradative organelles, lumen formation, basement membrane secretion,  
60 and many other signaling events [9, 12, 13]. Indeed, critical to the understanding of how  
61 endothelial cells build dynamic and resilient vascular structures is the regulation of membrane  
62 trafficking during angiogenic development.

63           The GTPase Rab35 has been shown to be a multi-faceted regulator of membrane  
64 trafficking and continues to be an intensely researched Rab family member [14]. The promiscuity  
65 of Rab35 touching multiple pathways has created a cognitive bottleneck in attempting to assign  
66 function in any system, due to its seemingly endless diversity of roles. For instance, Rab35 has  
67 been shown to be involved in cytokinesis as well as transcytosis of the apical protein podocalyxin  
68 during lumen biogenesis in epithelial cysts [15, 16]. In other investigations, Rab35 has been  
69 reported to be a negative regulator of the integrin recycling protein Arf6 via its effector ACAP2  
70 [17-19]. Additionally, MICAL1 has been shown to also facilitate Rab35's association with Arf6 and  
71 play a role in actin turnover [19-21]. In drosophila, Rab35 regulates apical constriction during  
72 germband extension as well as actin bundling via recruitment of fascin [22, 23]. To date, there is  
73 no unified study on Rab35 taking into account its many disparate functions in any tissue.  
74 Regarding blood vessel function, no endothelial studies exist detailing how, or if, Rab35 functions  
75 in sprouting angiogenesis.

76 In the current study, our goal was to comprehensively characterize Rab35's role in  
77 sprouting angiogenesis. To do so, we took a holistic approach in investigating established  
78 partners of Rab35 and characterized their effect on sprouting behaviors and downstream cellular  
79 morphodynamics in vitro and in vivo. Primarily using a 3-dimensional sprouting assay, our results  
80 revealed that Rab35 is required for sprouting as its loss significantly disrupts apicobasal polarity.  
81 Focusing on Rab35 effectors, we demonstrate that of the many reported effectors only ACAP2  
82 was capable of directly binding Rab35 in endothelial cells. However, upon investigating ACAP2  
83 and its target Arf6, we determined this established Rab35 trafficking cascade was largely  
84 insignificant with regard to sprouting angiogenesis. Excluding all other pathways, we focused on  
85 the Rab35 guanine exchange factor (GEF), DENNd1c, and its role in localizing Rab35 to actin  
86 structures. Our results demonstrate that DENNd1c facilitates Rab35 tethering to the actin  
87 cytoskeleton. Once on actin, Rab35 acts as a positive regulator of actin polymerization and is  
88 critical for formation of proper actin architecture. In vivo, we show the requirement of Rab35 in  
89 zebrafish blood vessel development using a gene editing approach. Overall, our results provide  
90 novel evidence of a focused role for Rab35 as a regulator of actin assembly during sprouting  
91 angiogenesis.

92

## 93 **MATERIALS AND METHODS**

### 94 **Reagents.**

95 All reagent information is listed in the reagents table in the supplementary information.

96

### 97 **Cell Culture.**

98 Pooled Human umbilical vein endothelial cells (HUVECs) were purchased from PromoCell and  
99 cultured in proprietary media (PromoCell Growth Medium, ready-to-use) for 2-5 passages. All  
100 cells were maintained in a humidified incubator at 37°C and 5% CO<sub>2</sub>. Small interfering RNA  
101 (ThermoFisher) was introduced into primary HUVEC using the Neon® transfection system



102 (ThermoFisher). Scramble, Rab35, Podocalyxin, ACAP2, OCRL, MICAL-L1, DENNd1a,  
103 DENNd1b, and DENNd1c were purchased from (ThermoFisher) and resuspended to a 20 $\mu$ M  
104 stock concentration and used at 0.5  $\mu$ M. Normal human lung fibroblasts (NHLFs, Lonza) and  
105 HEK-A (ThermoFisher) were maintained in Dulbeccos Modified Medium (DMEM) supplemented  
106 with 10% fetal bovine serum and antibiotics. Both NHLFs and HEKs were used up to 15 passages.  
107 For 2-dimensional live-imaging experiments, cells were imaged for one minute at baseline before  
108 treatment with CK-666 (1 $\mu$ M), and then imaged for an additional two minutes using 5 second  
109 intervals. For ligand-modulated antibody fragments tether to the mitochondria (Mito-LAMA)  
110 experiments procedures were carried out as previously described [47]. Briefly, cells were  
111 electroporated with mito-LAMA (pCDNA3.0\_mitoLAMA-G97), the protein of interest, as well as  
112 the target of interest (tag-RFP-DENND1c, mCherry-Arp2, or LifeAct-647). Baseline images were  
113 taken for 1 minute (5 second intervals), treated with Trimethoprim (TMP, 500 $\mu$ M) and promptly  
114 imaged for an additional 5 minutes at 5 second intervals.

115

### 116 **Sprouting Angiogenesis Assay.**

117 Fibrin-bead assay was performed as reported by Nakatsu et al. 2007 [25]. Briefly, HUVECs were  
118 coated onto microcarrier beads (Amersham) and plated overnight. SiRNA-treatment or viral  
119 transduction was performed the same day the beads were coated. The following day, the EC-  
120 covered microbeads were embedded in a fibrin matrix. Once the clot was formed media was  
121 overlaid along with 100,000 NHLFs. Media was changed daily along with monitoring of sprout  
122 development. Sprout characteristics were quantified in the following manner. Sprout numbers  
123 were determined by counting the number of multicellular sprouts (sprouts that did not contain at  
124 least 3 cells were not used in the analysis) emanating from an individual microcarrier beads across  
125 multiple beads in a given experiment. Sprout lengths were determined by measuring the length  
126 of a multicellular sprout beginning from the tip of the sprout to the microcarrier bead surface across

127 multiple beads. Percent of non-lumenized sprouts were determined by quantifying the proportion  
128 of multicellular sprouts whose length (microcarrier bead surface to sprout tip) was less than 80%  
129 lumenized across multiple beads. Sprout widths were determined by measuring the sprout width  
130 at the midpoint between the tip and the microcarrier bead across multiple beads. Actin  
131 accumulation were defined by actin puncta with a diameter greater than 1.5 $\mu$ m. Experimental  
132 repeats are defined as an independent experiment in which multiple cultures, containing  
133 numerous sprouting beads were quantified; this process of quantifying multiple parameters across  
134 many beads and several cultures was replicated on different days for each experimental repeat.

135

### 136 **Plasmid Constructs.**

137 The following constructs were procured for this study: GFP-Rab35 S22N inactive (gift from Peter  
138 McPherson; Addgene plasmid # 47426); GFP-Rab35 WT (gift from Peter McPherson, Addgene  
139 plasmid # 47424); GFP\_Rab35 Q67L (gift from Peter McPherson, Addgene plasmid # 47425);  
140 mEmerald-Fascin-C-10 (gift from Michael Davidson, Addgene plasmid # 54094); pARF6(Q67L)-  
141 CFP (gift from Joel Swanson, Addgene plasmid # 11387); pARF6(T27N)-CFP (gift from Joel  
142 Swanson, Addgene plasmid # 11386); pARF6-CFP (gift from Joel Swanson, Addgene plasmid #  
143 11382); pcDNA3-HA-human OCRL (gift from Pietro De Camilli, Addgene plasmid # 22207);  
144 pCDNA3.0\_mitoLAMA-G97 (gift from Kai Johnsson, Addgene plasmid # 130705); pGST1-GGA3-  
145 VHS (gift from James Hurley, Addgene plasmid # 44420); mEmerald-ARP2-C-14 (gift from  
146 Michael Davidson, Addgene plasmid # 53992); MICAL-L1 (Origene, RG214051); and DENNd1c  
147 (Origene, RC206410);

148

### 149 **Lentivirus and Adenovirus Generation and Transduction.**

150 Lentivirus was generated by using the LR Gateway Cloning method [24]. Genes of interest and  
151 fluorescent proteins were isolated and incorporated into a pME backbone via Gibson reaction

152 [69]. Following confirmation of the plasmid by sequencing the pME entry plasmid was mixed with  
153 the destination vector and LR Clonase. The destination vector used in this study was pLenti CMV  
154 Neo DEST (705-1) (gift from Eric Campeau & Paul Kaufman; Addgene plasmid #17392). Once  
155 validated, the destination plasmids were transfected with the three required viral protein plasmids:  
156 pMDLg/pRRE (gift from Didier Trono; Addgene plasmid # 12251), pVSVG (gift from Bob  
157 Weinberg; Addgene plasmid #8454) and psPAX2 (gift from Didier Trono; Addgene plasmid  
158 #12260) into HEK 293 cells. The transfected HEKs had media changed 4 hours post transfection.  
159 Transfected cells incubated for 3 days and virus was harvested.

160 Adenoviral constructs and viral particles were created using the Adeasy viral cloning  
161 protocol (9). Briefly, transgenes were cloned into a pShuttle-CMV plasmid (gift from Bert  
162 Vogelstein; Addgene plasmid #16403) via Gibson Assembly. PShuttle-CMV plasmids were then  
163 digested overnight with MssI (ThermoFisher) and Linearized pShuttle-CMV plasmids were  
164 transformed into the final viral backbone using electrocompetent AdEasier-1 cells (gift from Bert  
165 Vogelstein; Addgene, #16399). Successful incorporation of pShuttle-CMV construct into  
166 AdEasier-1 cells confirmed via digestion with PacI (ThermoFisher). 5000 ng plasmid was then  
167 digested at 37°C overnight, then 85°C for 10 minutes and transfected in a 3:1 polyethylenimine  
168 (PEI, Sigma):DNA ratio into 70% confluent HEK 293A cells (ThermoFisher) in a T-25 flask.

169 Over the course of 2-4 weeks, fluorescent cells became swollen and budded off the plate.  
170 Once approximately 70% of the cells had lifted off the plate, cells were scraped off and spun down  
171 at 2000 rpm for 5 minutes in a 15 mL conical tube. The supernatant was aspirated, and cells were  
172 resuspended in 1 mL PBS. Cells were then lysed by 3 consecutive quick freeze-thaw cycles in  
173 liquid nitrogen, spun down for 5 minutes at 2000 rpm, and supernatant was added to 2qty 70%  
174 confluent T-75 flasks. Propagation continued and collection repeated for infection of 10-15cm  
175 dishes. After collection and 4 freeze thaw cycles of virus collected from 10-15cm dishes, 8 mL  
176 viral supernatant was collected and combined with 4.4 g CsCl (Sigma) in 10 mL PBS. Solution  
177 was overlaid with mineral oil and spun at 32,000 rpm at 10°C for 18 hours. Viral fraction was

178 collected with a syringe and stored in a 1:1 ratio with a storage buffer containing 10 mM Tris, pH  
179 8.0, 100 mM NaCl, 0.1 percent BSA, and 50% glycerol. HUVEC were treated with virus for 16  
180 hours at a 1/1000 final dilution in all cell culture experiments.

181

## 182 **Immunofluorescence and Microscopy.**

183 For immunofluorescence imaging, HUVECs were fixed with 4% paraformaldehyde (PFA) for 7  
184 minutes. ECs were then washed three times with PBS and permeabilized with 0.5% Triton-X  
185 (Sigma) for 10 minutes. After permeabilization, cells were washed three times with PBS. ECs  
186 were then blocked with 2% bovine serum albumin (BSA) for 30 minutes. Once blocked, primary  
187 antibodies were incubated for approximately 4-24 hours. Thereafter, primary antibodies were  
188 removed, and the cells were washed 3 times with PBS. Secondary antibody with 2% BSA were  
189 added and incubated for approximately 1-2 hours, washed 3 times with PBS and mounted on a  
190 slide for imaging. For imaging the fibrin-bead assay, first fibroblasts were removed from the clot  
191 with a 1-minute trypsin incubation. Following incubation, the trypsin was neutralized with DMEM  
192 containing 10% BSA, washed 3 times with PBS, and fixed using 4% PFA for 40 minutes. After  
193 fixation, the clot was washed 3 times with PBS, permeabilized with 0.5% Triton-X for 2 hours and  
194 then blocked with 2% BSA for 1 hour prior to overnight incubation with primary antibodies. The  
195 following day, primary antibodies were removed, and the clot was washed 5 times with PBS and  
196 secondary antibody was added with 2% BSA and incubated overnight. Prior to imaging the clot  
197 was washed 5 times with PBS. All primary and secondary antibodies are listed in the  
198 Supplemental Data. Images were taken on a Nikon Eclipse Ti inverted microscope equipped with  
199 a CSU-X1 Yokogawa spinning disk field scanning confocal system and a Hamamatsu EM-CCD  
200 digital camera. Cell culture images were captured using a Nikon Plan Apo 60x NA 1.40 oil  
201 objective using Olympus type F immersion oil NA 1.518. All images were processed using ImageJ  
202 (FIJI).

203

204 **Detection of Globular and Filamentous Actin.**

205 Globular and filamentous actin ratios were determined by western blot as described by  
206 commercially available G-actin/ F-actin *In Vivo* Assay Kit (Cytoskeleton). Globular and  
207 filamentous immunocytochemistry was performed as previously described [53]. Briefly, cells were  
208 fixed with 4% PFA for 10 minutes and permeabilized in ice cold acetone for 5 minutes and  
209 washed. Cells were then incubated for 15 minutes in 2% BSA with globular actin-binding protein  
210 GC globulin (Sigma). Following incubation, cells were washed three times in PBS. After washes  
211 cells incubated with an anti-GC antibody in BSA for 15 minutes, washed three times, and  
212 incubated in anti-rabbit-555 secondary prior to imaging.

213

214 **Antibody Feeding Assay.**

215 Antibody feeding assay was carried out as previously described [70]. Briefly, cells were moved to  
216 4°C for 30 minutes to inhibit endocytosis and then  $\beta$ 1-integrin antibody was added to the culture  
217 for an additional 30 minutes. Following incubation, cells were washed 3 times with ice cold PBS  
218 and moved back into the 37°C degree incubator for 20 minutes. Cells were then fixed with 4%  
219 PFA for 8 minutes and washed with PBS.  $\beta$ 1-integrin antibody was added once more for 45  
220 minutes to label extracellular integrins, washed 3 times with PBS, and then incubated with the  
221 secondary antibody (Alexa 555). The secondary was washed 3 times with PBS and then  
222 permeabilized with 0.5% Triton-X for 10 minutes to gain access to the endocytosed  $\beta$ 1-integrin  
223 pool. Then a secondary antibody (Alexa 488) was added for 20 minutes to label the endocytosed  
224 integrins, washed and imaged.

225

226 **Wound Healing Assay.**

227 Treated cells were moved to Ildi culture insert plates with a two well silicone insert allowing for  
228 a defined cell-free gap. At 3 days post siRNA treatment the silicone insert was removed, and

229 cells were allowed to migrate for 6 hours. Thereafter, cells were fixed, and  
230 immunohistochemistry was performed. The distance traveled into the cell free space was  
231 measured between groups.

232

### 233 **Immunoblotting & Protein Pull-Down.**

234 HUVEC cultures were trypsinized and lysed using Ripa buffer (20 mM Tris-HCl [pH 7.5], 150 mM  
235 NaCl, 1 mM Na<sub>2</sub>EDTA, 1 mM EGTA, 1% NP-40, 1% sodium deoxycholate, 2.5 mM sodium  
236 pyrophosphate, 1 mM  $\beta$ -glycerophosphate, 1 mM Na<sub>3</sub>VO<sub>4</sub>, 1  $\mu$ g/mL leupeptin) containing 1x  
237 ProBlock™ Protease Inhibitor Cocktail -50 (GoldBio). Total concentration of protein in lysate was  
238 quantified using the Pierce™ BCA Protein Assay Kit measured at 562 nm and compared to a  
239 standard curve. 20-50  $\mu$ g protein was prepared in 0.52 M SDS, 1.2 mM bromothymol blue, 58.6%  
240 glycerol, 75 mM Tris pH 6.8, and 0.17 M DTT. Samples were boiled for 10 minutes, then loaded  
241 in a 7-12% SDS gel and run at 150 V. Protein was then transferred to Immun-Blot PVDF  
242 Membrane (BioRad) at 4°C, 100 V for 1 hour 10 minutes. Blots were blocked in 2% milk proteins  
243 for 1 hour, then put in primary antibody at specified concentrations overnight. After 3 10-minute  
244 washes with PBS, secondary antibodies at specified concentrations were applied for 4 hours.  
245 After 3 additional PBS washes, blots were developed with ProSignal® Pico ECL Spray.

246 For GGA3 pull-down experiments, GST-GGA3 was grown overnight in 50 mL of Laria-  
247 Bertani broth in NiCo21 E Coli (NEB). The following day the overnight culture was transferred to  
248 1L of terrific buffer. The culture was monitored for growth and induced at OD600 with IPTG  
249 (GoldBio, 12481) at a final concentration of 100 $\mu$ M. Following induction, bacteria were incubated  
250 for an additional 3 hours. Induced cells were collected and pelleted, with the pellet resuspended  
251 in cold PBS containing 1mg/ml lysozyme and 1x ProBlock™ Protease Inhibitor Cocktail -50 and  
252 then sonicated to lyse bacteria. Cell lysate was clarified by centrifugation and glutathione agarose  
253 resin (GoldBio) was added to affinity purify the GST-GGA3. After incubation, agarose resin was  
254 washed 2-3 times with PBS and stored at -20°C.

255

256 **Zebrafish Transplantation, Microangiography and Gene Editing.**

257 Zebrafish transplantations were performed as previously described [71]. Briefly, cells were  
258 harvested at the blastula stage from a tg(kdrl:mCherry) line and treated with CRISPR (described  
259 below) line using an Eppendorf CellTram and deposited into recipients harboring a tg(kdrl:eGFP)  
260 transgene allowing us to distinguish between host and recipient blood vessels.

261 For microangiography 48 hpf embryos were (anesthetized) with 1% tricaine for  
262 approximately 20 minutes prior to perfusion. Embryos were then loaded ventral side up onto an  
263 injection agarose facing the injection needle. Qdots (ThermoFisher) were sonicated prior to  
264 injection. Qdots were loaded into a pulled capillary needle connected to an Eppendorf CellTram  
265 and 1-3 $\mu$ l of perfusion solution was injected into the pericardial cavity. Once successfully  
266 perfused, embryos were embedded in 0.7% low melt agarose and imaged promptly. Images were  
267 taken on a Nikon Eclipse Ti inverted microscope equipped with a CSU-X1 Yokogawa spinning  
268 disk field scanning confocal system and a Hamamatusu EM-CCD digital camera using either  
269 Nikon Apo LWD 20x NA 0.95 or Nikon Apo LWD 40x NA 1.15 water objective.

270 Tol2-mediated transgenesis was used to generate mosaic intersomitic blood vessels as  
271 previously described [72, 73]. Briefly, Tol2 transposase mRNA were synthesized (pT3TS-Tol2  
272 was a gift from Stephen Ekker, Addgene plasmid # 31831) [74] using an SP6 RNA polymerase  
273 (mMessage Machine, ThermoFisher). A total of 400ng of transposase and 200ng of plasmid  
274 vector were combined and brought up to 10 $\mu$ L with phenol red in ddH<sub>2</sub>O. The mixture was injected  
275 into embryos at the 1-2 cell stage. Injected zebrafish were screened for mosaic expression at 48  
276 hpf and imaged.

277 CRISPR/cas9-mediated knockouts were performed as previously described [54]. Briefly,  
278 equal volumes of chemically synthesized AltR<sup>®</sup> crRNA (100  $\mu$ M) and tracrRNAr RNA (100  $\mu$ M)  
279 were annealed by heating and gradual cooling to room temperature. Thereafter the 50:50  
280 crRNA:tracrRNA duplex stock solution was further diluted to 25  $\mu$ M using supplied duplex buffer.

281 Prior to injection 25  $\mu$ M crRNA:tracrRNA duplex stock solution was mixed with 25  $\mu$ M Cas9 protein  
282 (Alt-R® S.p. Cas9 nuclease, v.3, IDT) stock solution in 20mM HEPES-NaOH (pH 7.5), 350mM  
283 KCl, 20% glycerol) and diluted to 5 $\mu$ M by diluting with water. Prior to microinjection, the RNP  
284 complex solution was incubated at 37°C, 5 min and then placed on ice. The injection mixture was  
285 micro-injected into 1-2 cell stage embryos. Crispant DNA was retrieved via PCR and subjected to  
286 sanger sequencing to visualize indel formation.

287

### 288 **Zebrafish Live Imaging and Quantification.**

289 All zebrafish presented were imaged at 48hpf. Prior to imaging, embryos were treated with 1%  
290 Tricaine for 20 minutes and afterwards embedded in 0.7% low melt agarose. Live imaging of  
291 Zebrafish intersomic vessels (ISVs) were performed using the spinning-disk confocal microscopy  
292 system mentioned above. ISVs that were analyzed were between the end of the yolk extension  
293 and tail. Parameters measured included ISV number, number of non-lumenized vessels (no  
294 visible separation between opposing endothelial cells in ISVs), and number of actin accumulations  
295 (actin accumulations with a diameter greater than 4 $\mu$ m).

296

### 297 **Scanning Electron Microscopy.**

298 Cells fixed for SEM were followed the procedure outlined by Watanabe, et al [75]. Scanning  
299 electron microscopy was performed at the University of Colorado Anschutz Medical Campus by  
300 Dr. Eric Wortchow.

301

### 302 **Statistical Analysis.**

303 Experiments were repeated a minimum of three times. Statistical analysis and graphing were  
304 performed using GraphPad Prism. Statistical significance was assessed with a student's unpaired  
305 t-test for a two-group comparison. Multiple group comparisons were carried out using a one-way



306 analysis of variance (ANOVA) followed by a Dunnett multiple comparisons test. Data was  
307 scrutinized for normality using Kolmogorov-Smirnov (K-S) test. Zebrafish sex distribution was not  
308 adjusted as sex determination did not occur at the stage of development in which the specimens  
309 were assayed. Statistical significance set a priori at  $p < 0.05$ .

310

## 311 RESULTS

### 312 *Rab35 is required for sprouting angiogenesis.*

313 To characterize the role of Rab35 in sprouting angiogenesis, we first cloned a fluorescently  
314 tagged version of Rab35 into a lentivirus expression system [24]. Thereafter, we transduced ECs  
315 and then challenged the cells to sprout in a fibrin-bead assay [25, 26]. Fibrin-bead sprouts  
316 demonstrate excellent angiogenic characteristics, reproducing the most salient sprouting  
317 behaviors, such as branching, lumenogenesis, anastomosis and tip/stalk cell signaling (**Fig. 1A**)  
318 [7, 8, 27]. Rab35 in 3-dimensional (3D) sprouts demonstrated strong membrane localization, co-  
319 localizing with apical marker podocalyxin and luminal actin, opposite basally located  $\beta 1$ -integrin  
320 (**Fig. 1B, Movie 1**). To test whether Rab35 was necessary for endothelial sprouting, we knocked  
321 down Rab35 using siRNA (**Fig. 1C**). Loss of Rab35 reduced sprout length and sprouts per bead  
322 by ~50%, with a significant increase in the percentage of non-lumenized sprouts (**Fig. 1D-G**).  
323 Morphologically, the sprouts appeared stubby, non-lumenized and generally dysmorphic  
324 compared with controls (**Fig. 1D**). These results indicate that Rab35 is required for proper sprout  
325 development.

326 Given Rab35 depletion exhibited such a profound impact on sprouting parameters, we  
327 stained for various cytoskeletal, apical and basal markers to determine if Rab35 was affecting  
328 specific polarity pathways or producing a more global cellular defect. Imaging for VE-cadherin  
329 (cell-cell junctions), podocalyxin,  $\beta 1$ -integrin (basal membrane), moesin (cytoskeletal, apical  
330 membrane), synaptotagmin-like protein-2 (apical membrane) and phosphorylated-Tie2 (apical

331 membrane) revealed that Rab35 knockdown affected all protein localization (**Fig. S1A**),  
332 suggesting that loss of Rab35 globally disturbs cell polarity programs. Emblematic of this was  
333 the significant lack of lumen formation and the increase in discontinuous vacuoles in the Rab35  
334 depleted condition (**Fig. S1B**), as lumenogenesis requires proper apicobasal signaling to form [7,  
335 28]. We also observed that Rab35 knockdown reduced the number of nuclei per sprout, indicating  
336 the presence of cell division defects in line with other reports [16, 29-31] (**Fig. S1C**). Overall, this  
337 data suggests that Rab35 plays a significant role in establishing cell polarity during angiogenic  
338 sprouting.

339 We next employed a mosaic approach to determine the cell autonomous nature of Rab35  
340 depletion in a sprout collective. To do so, we treated ECs with either Rab35 siRNA or a scramble  
341 control. Thereafter, the knockdown population was marked with cell-tracker and mixed 50:50 with  
342 wild-type ECs. The resulting mosaic sprouts contained a mixture of siRNA-treated and untreated  
343 ECs (**Fig. 1H**). Cells contained within sprouts were then binned into two categories: 1) not-  
344 opposing, an isolated siRNA-treated cell; or 2) opposing, two adjacent siRNA-treated ECs (**Fig.**  
345 **1I,J**). Our results demonstrate that Rab35 knockdown in not-opposing ECs contained actin-  
346 labeled vacuolations and polarity defects as indicated by a reduction in lumen formation compared  
347 with scramble-treated controls (**Fig. 1I-M**). For Rab35 depleted ECs in the opposing orientation  
348 defects were even more pronounced with complete lumen failures at these sites, while also  
349 exhibiting multiple vacuolations and polarity defects (**Fig. 1I-M**). Overall, these results indicate  
350 that Rab35 is cell autonomous and is required for EC polarity.

351

### 352 ***Rab35 resides at the apical membrane during sprouting.***

353 As the loss of Rab35 produced such a profound effect on EC sprouting, we sought to  
354 better understand its cellular localization to gain insight into its potential function. In sprouts,  
355 quantification of Rab35 enrichment between different cellular compartments showed a preference  
356 for the apical membrane for wild-type (WT) and constitutively active (CA) Rab35 variants, while

357 the dominant-negative (DN) Rab35 mutant resided in the cytoplasm (**Fig. 2A**). In this regard,  
358 subcellular imaging of WT and CA Rab35 showed a strong colocalization with apical podocalyxin  
359 (**Fig. 2B**). Similar to loss of Rab35, expression of the DN Rab35 also produced polarity defects,  
360 such as mislocalization of podocalyxin and large actin accumulations (**Fig. 2B**). To more  
361 conclusively assign Rab35 phenotypes, we performed several rescue assays by knocking down  
362 the endogenous Rab35 and then over-expressing Rab35 variants in sprouts. Expression of WT  
363 or CA Rab35 decreased the number of non-lumenized sites in sprouts compared to endogenous  
364 Rab35 knockdown alone expressing a GFP control, but not to levels in the scramble treated group  
365 (**Fig. 2C,D; S2A,B**). Rab35 knockdown and expression of the DN Rab35 mutant showed the  
366 highest increase in dysmorphic sprouts, exhibiting numerous accumulations of actin puncta and  
367 lumen defects, again suggesting Rab35 is necessary for sprout function.

368 Within the sprout body, Rab35 also localized to actin at cytokinetic bridges as previously  
369 described [16, 29, 31], but had no preference for filopodia extensions or tip-cell positioning (**Fig.**  
370 **S3A,B**). In 2D culture, we also observed that Rab35 modestly colocalized with filamentous actin  
371 in a monolayer; however, this association was reduced in migratory cells (**Fig. S3C,D**). Previous  
372 reports have implicated Rab35 in Wiebel Palade Body (WPB) granule release [32]. Although loss  
373 of Rab35 may alter WPB secretion, likely due to the impact on cell polarity, in our hands Rab35  
374 did not colocalize with these structures in 2D or 3D culture systems (**Fig. S3E,F**). These results  
375 indicate that Rab35 is largely localized to the apical membrane in its active form as well as areas  
376 of high actin density.

377 Previous literature in epithelial tissue has reported that Rab35 participates in trafficking of  
378 podocalyxin to the apical membrane [15, 16]. In the sprouting model, we observed a strong  
379 colocalization of Rab35 and podocalyxin at the apical membrane as well as mislocalization of  
380 podocalyxin in the absence of Rab35. This data could be interpreted as a loss of, or defective,  
381 podocalyxin trafficking given Rab35's previous association with this pathway. As colocalization of  
382 podocalyxin and Rab35 at the apical membrane could be circumstantial as many proteins localize

383 to the apical membrane during lumenogenesis, we overexpressed TagRFP-Rab35 and stained  
384 for endogenous podocalyxin in 2D culture and did not detect any significant signal overlap (**Fig.**  
385 **S4A**). Previous literature showed that Rab35 directly binds to the cytoplasmic tail of podocalyxin  
386 [16]. Overexpression of the human podocalyxin cytoplasmic domain (residues 476–551) and  
387 TagRFP-Rab35 also did not show any obvious association (**Fig. S4A**). To further probe for this  
388 previously reported binding between Rab35 and podocalyxin, we engineered a mitochondrial-  
389 targeted Rab35 to test what proteins or complexes bind Rab35 and are then ‘pulled’ along to  
390 mitochondria. Expression of WT or CA mitochondrial-targeted Rab35 did not show any  
391 association with endogenous podocalyxin or overexpression of its cytoplasmic tail domain (**Fig.**  
392 **S4B,C**). We next reasoned if mistrafficking of podocalyxin by way of Rab35 depletion was the  
393 predominant mechanism underpinning the sprouting defects, then knocking down podocalyxin  
394 would produce a similar phenotype as compared with loss of Rab35. Knockdown of podocalyxin  
395 did not phenocopy Rab35-mediated sprouting defects (**Fig. S4D-I**). The only exception was that  
396 podocalyxin knockdown increased the percentage of non-lumenized sprouts compared with  
397 controls. Overall, our data suggests that Rab35 does not directly participate in podocalyxin  
398 trafficking in ECs; however, loss of Rab35 distorts podocalyxin’s localization to the apical  
399 membrane likely due to other alterations in cell polarity.

400

#### 401 ***Rab35 interacts with ACAP2 in endothelial cells.***

402 To take a more holistic approach in determining how Rab35 functions in endothelial tissue,  
403 we performed a functional screen by knocking down the most highly cited Rab35 effectors singly  
404 and in combination, to determine if any effector combination phenocopied Rab35 sprouting  
405 defects (**Fig. 3A,B**) [15, 17-19, 30, 32-35]. First, we found that Rab35 itself did not produced a  
406 significant effect on 2D cell motility, suggesting the primary defect in sprouting may be due to  
407 altered apicobasal polarity only detectable in the 3D sprout environment (**Fig. S5A,C**). As Rab35  
408 and ACAP2 have been shown to affect the integrin recycling pathway via their association with

409 Arf6, we also assayed for integrin recycling as defective integrin signaling could also affect cell  
410 polarity. As compared with the scramble controls, knockdown of Rab35 and OCRL significantly  
411 increased integrin recycling, while ACAP2 and MICAL-L1 had no effect (**Fig. S5B,D**).

412 Next, we determined that RUSC protein levels were not detectable in ECs, thus was  
413 excluded from our screen (**Fig. S6F**). ACAP2, OCRL, or MICAL-L1 or any combination of  
414 knockdown targeting these proteins, demonstrated the greatest phenotypic similarity to Rab35  
415 knockdown with regard to sprouting parameters (**Fig. 3C-G**). Upon closer inspection, both ACAP2  
416 and OCRL knockdowns were associated with elevated frequencies of non-lumenized sprouts with  
417 disorganized actin, although to a lesser extent than compared with Rab35 (**Fig. 3C**). These results  
418 suggest that ACAP2 and OCRL potentially resemble a Rab35 sprouting defect.

419 Both ACAP2 and OCRL have been reported to directly bind Rab35 [17-19, 30, 32, 35];  
420 however, this interaction has not been validated in ECs. First, we overexpressed tagged versions  
421 of ACAP2, OCRL and MICAL-L1 to visualize their localization patterns with Rab35 in ECs. Rab35  
422 and ACAP2 strongly colocalized to the plasma membrane, while Rab35 did not show strong  
423 localization with ORCL or MICAL-L1 (**Fig. 3H**). Further testing for potential interactions, we again  
424 used the mitochondrial-targeted Rab35 to visualize any physical association between Rab35 and  
425 these previously published effectors. Co-expression of WT and CA Tom20-Rab35 with ACAP2  
426 demonstrated strong colocalization at the mitochondria, while the DN Rab35 showed no  
427 significant binding of ACAP2 (**Fig. 3I; S6A,B**). We performed this same experiment using ACAP2  
428 with the ankyrin repeat domain deleted and observed no binding, indicating Rab35 directly  
429 interacts with this domain (**Fig. S6B**). As a control, we also co-expressed a tom20-Rab27a and  
430 ACAP2 and observed no mislocalization of ACAP2 (**Fig. S6C**), suggesting ACAP2's affinity for  
431 Rab35 is specific. Co-expression of WT, CA or DN Tom20-Rab35 with OCRL or MICAL-L1 did  
432 not show any colocalization at the mitochondria, signifying a lack of binding (**Fig. 3I; S6D,E**).  
433 These results demonstrate that ACAP2, not OCRL or MICAL-L1, directly interacts with Rab35 in  
434 endothelial tissue.

435

436 ***Rab35 does not impact Arf6 activity in endothelial cells.***

437 Previous literature has shown that ACAP2 works as a GTPase activating protein (GAP)  
438 with Rab35 to inactivate the GTPase Arf6 [17, 18, 33]. Arf6 has been shown to be involved with  
439 actin remodeling and integrin recycling [19, 36-38]. To test if this association exists in ECs, we  
440 first determined the localization of Arf6 relative to Rab35 and ACAP2 in 2D culture. Cells  
441 expressing tagged Rab35 and Arf6, or ACAP2 and Arf6 demonstrated modest colocalization  
442 throughout the cell with the greatest colocalization at the cell cortex (**Fig. S7A**). Using WT, CA  
443 and DN versions of Arf6, we stained for actin to determine if Arf6, like Rab35, associated with  
444 actin structures. Similar to Rab35, in peripheral membrane protrusions, WT and CA Arf6  
445 demonstrated moderate colocalization with actin; however, this association did not persist on  
446 filamentous actin located towards the cell interior (**Fig. S7B**). In sprouts, Arf6 showed weak  
447 localization to the apical membrane as compared to Rab35 (**Fig. S7C**). Once again using  
448 mitochondrial-mistargeting, we tested for binding between Arf6 and Rab35. Mitochondrial-  
449 targeted Rab35 did not pull Arf6, indicating a lack of binding interaction (**Fig. S7D**). To further  
450 confirm this, we used the Tom20 epitope to target ACAP2 to the mitochondria to determine if Arf6  
451 interacts with ACAP2. Our results show that Arf6 does not localize to the mitochondria, indicating  
452 ACAP2 does not strongly interact with Arf6 in ECs (**Fig. S7D**). We reasoned that the lack of  
453 binding between Arf6 and ACAP2 could be due to an insufficiency of Rab35, as Rab35 is  
454 hypothesized to regulate ACAP2's availability to act upon Arf6 [17]. Therefore, we simultaneously  
455 expressed Tom20-Rab35, TagRFP-ACAP2 and HA-Arf6 in hopes that the Rab35 bound to  
456 ACAP2 would recruit Arf6 to the mitochondria. Our results demonstrate that Arf6 did not localize  
457 with mitochondrial Rab35 and ACAP2, suggesting ACAP2 does not directly act upon Arf6, or that  
458 this signaling does not require a robust binding interaction in ECs (**Fig. S7E**).

459 Due to the wealth of literature demonstrating loss of Rab35 increases Arf6 activity in non-  
460 endothelial tissues, we sought to confirm this signaling interaction biochemically. To do so, we

461 first expressed WT, CA, and DN versions of Arf6 in ECs and used recombinant GGA3 to pull down  
462 the active form of Arf6 as others have reported [39]. Pull down using GGA3 demonstrated more  
463 binding with the CA mutant as compared with the WT and DN versions of Arf6, validating this  
464 approach for testing Arf6 activity (**Fig. S7F**). Next, we knocked down and over-expressed Rab35  
465 in ECs and then probed for active Arf6. Knockdown of Rab35 or overexpression of Rab35 did not  
466 significantly alter Arf6 activity in ECs (**Fig. S7G**). These results would suggest that loss of Rab35  
467 does not affect Arf6 activation. Previous literature reported that knockdown of Rab35 promoted  
468 Arf6 activity; thus, we next tested if overactivation of Arf6 would phenocopy the Rab35 loss of  
469 function sprouting phenotype to more thoroughly factor out this signaling pathway. Moving to Arf6  
470 overexpression in sprouts, we observed that both WT and CA Arf6 marginally affected sprouting  
471 parameters with the WT and CA Arf6 increasing the frequency of lumen failures compared with  
472 the DN version (**Fig. S7H**). A primary phenotype in sprouts deficient in Rab35 was abundant actin  
473 aggregates and the presence of non-apical podocalyxin. Inconsistent with these observations,  
474 ECs expressing CA Arf6 demonstrated normal actin architecture as well as typical podocalyxin  
475 apical deposition (**Fig. S7I**). These results suggest that overactivation of Arf6 due to loss of Rab35  
476 is likely not the causative pathway promoting sprouting defects.

477

#### 478 ***DENNd1c is required for Rab35 function.***

479 We were intrigued by the idea that other roles of Rab35 were being unaccounted for as  
480 Arf6 activation was largely unaffected by loss of Rab35 in ECs. Earlier we observed that Rab35  
481 colocalized with actin. Additionally, a consistent phenotype we observed was impaired actin  
482 organization, marked by actin aggregates in Rab35 knockdown sprouts. To this end, Rab35 has  
483 3 GEFs, DENNd1a-c [40-43]. DENNd1c has been shown to play a more uncharacteristic role,  
484 being less involved with GTP hydrolysis, but demonstrating the lone ability to bind to both globular  
485 and filamentous actin, mediating Rab35 localization to these microfilaments [41]. Exploring this  
486 association, we knocked down DENNd1a-c individually and in combination. Loss of DENNd1a



487 and DENNd1b did not produce any significant impact on sprouting morphology; however,  
488 knockdown of DENNd1c alone resulted in growth of dysmorphic sprouts mirroring Rab35 loss of  
489 function (**Fig. 4A-E; Movie 2,3**). Knockdown of all DENNd1s produced the greatest effect on  
490 sprouting behaviors, presumably because the GEF activity provided by DENNd1a/b was also lost  
491 (**Fig. 4D-F**). We also confirmed that knocking down any given DENNd1 did not result in a  
492 compensatory increase in expression of the remaining DENNd1s (**Fig. S8B**). Staining for actin  
493 demonstrated that DENNd1c knockdown produced the greatest number of aberrant actin  
494 accumulations similar to the Rab35 knockdown phenotype (**Fig. 4C,G**). We next cloned and  
495 tagged DENNd1c to visualize its cellular localization with Rab35. DENNd1c and Rab35 showed  
496 strong colocalization on actin in 2D cell culture (**Fig. S8A**). We also expressed Rab35 with the  
497 integral actin protein Arp2 that mediates actin filament branching [44], Rab35 localized to areas  
498 of active polymerization marked by Arp2/Rab35 localization. Rab35, Arp2 and filamentous actin  
499 colocalized in many areas (**Fig. S8A**). To explore if DENNd1c, per se, was responsible for  
500 tethering Rab35 to actin, we individually knocked down all three DENNd1s and quantified the  
501 relative amount of Rab35 uniformly localized at the plasma membrane, accumulated at the  
502 plasma membrane or in the cytoplasm. DENNd1c knockdown exhibited the greatest increase in  
503 apical plasma membrane accumulations compared with DENNd1a or DENNd1b (**Fig. 4H**). These  
504 data indicate that loss of DENNd1c phenocopies the Rab35 knockdown effect on sprouting  
505 parameters and the actin cytoskeleton.

506

### 507 **Rab35 and DENNd1c localize to sites of actin polymerization.**

508 We next sought to comprehensively characterize the association between Rab35,  
509 DENNd1c and branched actin located at the cell periphery. To do so, we again overexpressed  
510 the actin-specific protein Arp2 as a marker of active actin polymerization [45]. Both Rab35 and  
511 DENNd1c demonstrated strong colocalization to Arp2 and the underlying actin (**Fig. 5A**). To  
512 specifically perturb the branched actin network, we next treated cells with the Arp2/3 inhibitor CK-



513 666 [46] and then determined the effect on Rab35 and DENNd1c localization. In 3D sprouts,  
514 inhibition of branching actin resulted in accumulations of actin similar to the Rab35 knockdown  
515 phenotype (**Fig. 5B, S8D; Movie 4,5**). In 2D culture, CK-666 treatment rapidly depleted actin at  
516 the cell cortex (**Fig. 5C**). Rab35 prior to CK-666 administration exhibited a uniform distribution in  
517 the plasma membrane with enrichment at sites of actin accumulation adjacent to the cell  
518 periphery. However, after inhibition of branched actin formation Rab35 collapsed into discrete  
519 puncta scattered throughout the cytoplasm. Interestingly, CK-666 treatment created large,  
520 presumably globular, actin vacuoles which were then surrounded by Rab35 (**Fig. 5C, S8E; Movie**  
521 **6**); we believe these structures are analogous to the actin accumulations observed in sprouts  
522 when Rab35 is depleted. As a control we performed the same experiment with Rab11a and did  
523 not observe any alteration in Rab11a localization with CK-666 treatment (**Fig. S8C**), suggesting  
524 not all Rabs are dependent on actin for their localization. Using the same approach with  
525 DENNd1c, we observed, again, DENNd1c was highly enriched at cortical actin; however,  
526 treatment with CK-666 effectively depleted DENNd1c from this actin population (**Fig. 5D**). Unlike  
527 Rab35, CK-666 treatment did not cause the formation of puncta, but the redistribution of  
528 DENNd1c to unaffected actin, such as filamentous actin towards the cell interior (**Fig. 5D; Movie**  
529 **7**). As a control, we treated cells with CK-666 expressing both Rab35 and Arp2. As expected,  
530 Arp2 was no longer located on actin, collapsing into puncta, while remaining adjacent to Rab35  
531 (**Fig. 5E; Movie 8**). These data suggest that Rab35 and DENNd1c are recruited to polymerizing  
532 actin filaments. Additionally, in the absence of active actin polymerization Rab35 collapses into  
533 vesicular structures.

534 To visualize Rab35's temporospatial recruitment to cortical actin, we employed a  
535 chemically switchable GFP-binding nanobody, termed ligand-modulated antibody fragments  
536 (LAMAs) [47]. This method allowed us to sequester GFP-tagged Rab35 at the mitochondria and  
537 then rapidly release the protein upon drug treatment, enabling dynamic imaging of localization  
538 patterns (**Fig. 5F**). Using GFP-Rab35, LAMA and TagRFP647-LifeAct [48] expressing cells, we

539 release GFP-Rab35 from mitochondria and live-imaged its localization preferences. Our data  
540 shows that Rab35 quickly localizes to the cell periphery following trimethoprim (TMP) treatment.  
541 Of note, Rab35 did not co-localize with longer-lived filamentous actin, as the LifeAct probe  
542 primarily decorates this population (**Fig. 5G, Movie 9**). When repeated with tagged Arp2, Rab35  
543 quickly (~2min) localized to Arp2 puncta on the cell cortex (**Fig. 5H; Movie 10**). Rab35 also  
544 demonstrated a preference for sites of DENNd1c when released from the mitochondria (**Fig. 5I,**  
545 **Movie 11**). Next, we released Rab35 and imaged its localization to Arp2, and then immediately  
546 treated with CK-666 to determine how this association would be affected. Administration of CK-  
547 666 rapidly dissociated Rab35 and Arp2 at the cortex (**Fig. 5J; Movie 12**). Lastly, to test if  
548 DENNd1c was responsible for recruiting Rab35 to branched actin, we knocked down DENNd1c  
549 and repeated the LAMA localization experiments. Upon release, Rab35 showed a reduction in its  
550 ability to localize to cortical Arp2, suggesting DENNd1c is important for this interaction (**Fig. 5K;**  
551 **Movie 13**). Overall, these data suggest that Rab35 is rapidly recruited to the cortex and is  
552 anchored to actin filaments by DENNd1c.

553

#### 554 **Rab35 promotes actin assembly.**

555 Our previous data indicates that in the absence of Rab35 global apicobasal polarity is  
556 affected, which is likely due to significant alterations in the actin cytoskeleton. Also, Rab35  
557 colocalized with actin and actin polymerizing protein Arp2. Thus, our next aim was to test whether  
558 Rab35 affected actin polymerization, per se. Prior literature indicates that Rab35 would increase  
559 actin polymerization via its purported trafficking interactions with Cdc42 and Rac1 [40, 41, 43];  
560 however, others have claimed Rab35 may act as a brake for actin polymerization through its  
561 association with MICAL-L1 in non-endothelial tissues [21]. To begin to explore how Rab35 impacts  
562 actin in ECs, we transfected Rab35 variants WT, CA and DN into freely migrating ECs. It is well-  
563 established that lamellipodia protrusions (membrane movement away from the cell body) and  
564 retractions (membrane movement towards the cell interior) are primarily mediated by local actin

565 assembly and disassembly [49, 50]. Attempting to monitor global lamellipodia dynamics in an  
566 unbiased fashion, we employed the open source software ADAPT [51]. Our analysis determined  
567 that only the Rab35-CA mutant significantly increased both the cells protrusive and retractive  
568 capabilities, a finding in line with enhanced migration (**Fig. 6A,B**). Interestingly, knockdown of  
569 Rab35 did not shift membrane dynamics significantly, potentially suggesting Rab35-based actin  
570 regulation may play a more critical role in 3D sprouting.

571         Based off this finding, we reasoned that if Rab35 was involved with actin polymerization,  
572 then knockdown of Rab35 would shift the balance between globular and filamentous actin to skew  
573 more globular, as less filaments are being assembled. Using differential centrifugation, we  
574 separated the globular and filamentous pools of actin as previously reported [52]. Rab35  
575 knockdown significantly increased the globular actin abundance compared with control (**Fig.**  
576 **6C,D**). Using a similar method, we stained for globular actin using GC globulin and phalloidin to  
577 detect the filamentous actin [53]. Again, our results demonstrated an increase in globular to  
578 filamentous actin ratio in the absence of Rab35 as compared with controls (**Fig. 6E,F**). We also  
579 co-stained for globular and filamentous actin while expressing Rab35 to ensure Rab35  
580 colocalized with both actin populations. Indeed, Rab35 was strongly localized to sites of globular  
581 actin that were also positive for filamentous actin (**Fig.S8F**).

582         Lastly, we used scanning electron microscopy to better visualize the remaining actin  
583 network in ECs depleted of Rab35 or treated with CK-666. Qualitatively, there was reduced  
584 filament density in the lamellipodia regions of the Rab35 depleted and CK-666 treated conditions  
585 as compared with control (**Fig. 6G**). In Rab35 depleted ECs, we also observed elevated instances  
586 of bundles of actin that were more disorganized in appearance as compared with control (**Fig.**  
587 **6G**), potentially representing a compensatory effect for the lack of filamentous actin. Overall,  
588 these results suggest that Rab35 is associated with regulating local sites of actin assembly.

589

590 ***Rab35 is required for blood vessel development in zebrafish.***

591 We next generated a Rab35 knockout in zebrafish using CRISPR/Cas9 gene editing to  
592 test if Rab35 was also required for in vivo angiogenic processes [54]. In zebrafish, we targeted  
593 both Rab35 paralogs, Rab35A and Rab35B. By sequence analysis we observed 100% indel  
594 formation in F<sub>0</sub> injected zebrafish for both Rab35 paralogs (**Fig. 7A**). Double Rab35A/B knockout  
595 was embryonic lethal marked by a lack of normal development as compared with scramble guide  
596 injected controls, suggesting Rab35 is critical for normal embryonic development (**Fig. 7B**).  
597 However, we did see a spectrum of developmental defects when the single-guide RNA amount  
598 were diluted. In a vascular Lifeact-GFP expressing line injected with a sublethal dosage of  
599 Rab35A/B single-guide RNA, we focused on actin defects. Here, we did not quantify vascular  
600 defects due to the generalized tissue dysmorphogenesis of these embryos; alternatively, our goal  
601 was to determine if similar actin accumulations occurred in vivo as observed in vitro. In line with  
602 our in vitro data, we observed a significant increase in actin aggregations in the Rab35A/B  
603 knockout group compared with controls (**Fig. 7C,D**). Similarly, overexpression of the DN Rab35  
604 mutant or treatment with CK-666 promoted an increase in aberrant Rab35 accumulations,  
605 presumably bound to actin (**Fig. 7E,F**). To subvert the lethality of global Rab35A/B deletion, we  
606 generated chimeric embryos using blastomere transplants [55]. Transfer of Rab35A/B CRISPR  
607 injected cells into a WT host generated mosaic intersomitic blood vessels (ISVs) allowing for  
608 comparison of both WT and Rab35A/B null blood vessels side-by-side. Similar to in vitro results,  
609 Rab35A/B null ISVs were dysmorphic, marked by a thin appearance and the absence of a lumen  
610 as assessed by microangiography (**Fig. 7G,H**). Overall, these results indicate Rab35 is necessary  
611 for organismal viability and actin homeostasis in vivo.

612

## 613 **DISCUSSION**

614 In the current work, we explored the contribution of Rab35 to angiogenic sprouting  
615 behaviors vital to blood vessel development. The primary goal of this work was to interpret what  
616 of the many reported functions of Rab35 matters most during blood vessel morphogenesis by

617 systematically characterizing Rab35 itself and the downstream effector pathways. Using a  
618 combination of 3D sprouting, biochemistry and in vivo gene editing, we demonstrate that Rab35's  
619 most prominent function is to regulate actin dynamics during angiogenesis. More specifically, we  
620 show that the GEF DENNd1c tethers active Rab35 to the actin cytoskeleton. Once localized to  
621 actin, Rab35 promotes actin polymerization and remodeling required for sprout formation.  
622 Additionally, we confirmed that Rab35 is required for blood vessel development in zebrafish. To  
623 our knowledge, this is the first investigation demonstrating the requirement of Rab35 for blood  
624 vessel function and the first investigation in any tissue dissecting Rab35's most dominant  
625 biological role accounting for the most prominent effector pathways.

626         The genesis of the current project was originally aimed to characterize how podocalyxin  
627 was trafficking in ECs, as this is still an outstanding question in the field. Our past work  
628 demonstrated Rab27a, that was largely implicated in podocalyxin trafficking in epithelial cells, was  
629 not related to this pathway [7], thus our very next candidate was Rab35. Others have  
630 comprehensively established a direct association between Rab35 and podocalyxin as well as the  
631 downstream impact on lumen biogenesis [15, 16]. Our data in the current investigation once again  
632 shows that endothelial trafficking signatures greatly differ from epithelial programs. More  
633 specifically, we expansively tested for both localization and direct binding interaction between  
634 Rab35 and podocalyxin of which we found none. However, this negative result prompted us to  
635 further investigate Rab35 function during angiogenic sprouting.

636         Rab proteins are the most numerous subset of Ras family small guanosine  
637 triphosphatases (GTPases). Rab proteins control biogenesis, movement, and docking of vesicles  
638 in specific trafficking pathways by recruiting unique effector proteins to different membrane  
639 compartments [13, 56]. Rab35, in particular, has been shown to have many roles that vary by  
640 tissue type, organism, and developmental stage. In distilling the literature, it can be argued that  
641 Rab35 has four major effectors that mediate its function in vertebrates: RUSC, MICAL-L1,  
642 ACAP2, and OCRL. Given Rab-family GTPases exert their function via effector interaction, we

643 began by first establishing that Rab35 was required for sprouting, and then determined how each  
644 effector contributed to the loss of Rab35 phenotype. Surprisingly, RUSC, MICAL-L1 and OCRL  
645 either showed no phenotypic contribution to sprouting or failed to directly bind Rab35. The most  
646 promising candidate ACAP2 exhibited the best phenotype for recapitulating the Rab35 loss of  
647 function effect. In terms of ACAP2, we had several interesting findings. The predominant  
648 hypothesis is that GTP Rab35 binds ACAP2 sequestering its ability to inactivate Arf6, resulting in  
649 a gain of function for Arf6. In ECs, we could not confirm direct binding between ACAP2 and Arf6,  
650 we also did not observe that Rab35 knockdown affected Arf6 activity as previously reported [17-  
651 19, 29, 32, 33, 37, 38]. These previous reports were carried out in non-endothelial tissue, which  
652 may explain the signaling discrepancy. However, we also overexpressed a CA Arf6, the predicted  
653 outcome of loss of Rab35 in the aforementioned epithelial systems, and also could not phenocopy  
654 the Rab35 loss of function effect on sprouting, again suggesting this signaling pathway is not  
655 essential in ECs in the absence of Rab35.

656 A major finding was that the GEF DENNd1c played a key role in Rab35 function.  
657 Canonically, GEFs primarily convert proteins from a GDP to GTP-bound state; however,  
658 DENNd1c is evolutionarily divergent from both DENNd1a/b that solely control Rab35 GTPase  
659 activity [41]. In our hands, loss of DENNd1c did not alter GTP activation, but controlled the  
660 localization of Rab35 to actin fibrils. Knockdown of DENNd1c strongly phenocopied loss of Rab35  
661 suggesting that localization to actin is a primary function of Rab35 during sprouting angiogenesis.

662 Actin plays a pivotal role in angiogenesis both from a cell migration and vessel stabilization  
663 aspect [57-62]. Loss of normal actin architecture has been shown to drastically affect virtually all  
664 facets of blood vessel formation [63-67]. In this sense, our results are not surprising in that actin  
665 misregulation promoted such a profound effect on sprouting parameters. However, given Rab35's  
666 broad scope of function as well as never being characterized in angiogenic processes, it would  
667 be exceedingly hard to predict. Moreover, actin regulation is typically known to be directly  
668 controlled through more conventional signaling paradigms such as Rac1 and CDC42. Our results

669 paint a novel scenario that trafficking-based regulators can control vital crosstalk with the actin  
670 cytoskeleton. It is still an outstanding question what of the hundreds of cytoskeletal proteins  
671 Rab35 is interfacing with to participate in actin regulation processes.

672 Overall, our investigation is the first to systematically rule out other known Rab35  
673 pathways, highlighting Rab35's novel function in mediating actin dynamics during blood vessel  
674 formation in vitro and in vivo. We believe this work is important not only from the vantage of  
675 understanding EC biology and its unique trafficking signatures, but from a disease standpoint as  
676 Rab35 is commonly upregulated in solid cancers [68]. In general, we contend that mapping  
677 endothelial trafficking patterns will shed important light on how ECs orchestrate blood vessel  
678 formation by integrating both cell-autonomous and collective-cell signaling.

679

## 680 **ACKNOWLEDGEMENTS**

681 Work was supported by funding from the National Heart Lung Blood Institute (Grant  
682 1R56HL148450-01, R15HL156106-01A1, R01HL155921-01A1) (EJK).

683

## 684 **CONTRIBUTIONS**

685 CRF, HK and EJK performed all experiments. CRF and EJK wrote the manuscript.

686

687



688 **LITERATURE CITED**

- 689
- 690 1. Kushner, E.J. and V.L. Bautch, *Building blood vessels in development and*  
691 *disease*. Curr Opin Hematol, 2013. **20**(3): p. 231-6.
  - 692 2. Chappell, J.C., D.M. Wiley, and V.L. Bautch, *How blood vessel networks are*  
693 *made and measured*. Cells Tissues Organs, 2012. **195**(1-2): p. 94-107.
  - 694 3. Ehling, M., et al., *Notch controls retinal blood vessel maturation and quiescence*.  
695 *Development*, 2013. **140**(14): p. 3051-61.
  - 696 4. Eilken, H.M. and R.H. Adams, *Dynamics of endothelial cell behavior in sprouting*  
697 *angiogenesis*. Curr Opin Cell Biol, 2010. **22**(5): p. 617-25.
  - 698 5. Kofler, N., et al., *The Rab-effector protein RABEP2 regulates endosomal*  
699 *trafficking to mediate vascular endothelial growth factor receptor-2 (VEGFR2)-*  
700 *dependent signaling*. J Biol Chem, 2018. **293**(13): p. 4805-4817.
  - 701 6. Kempers, L., et al., *The endosomal RIN2/Rab5C machinery prevents VEGFR2*  
702 *degradation to control gene expression and tip cell identity during angiogenesis*.  
703 *Angiogenesis*, 2021.
  - 704 7. Francis, C.R., S. Claflin, and E.J. Kushner, *Synaptotagmin-Like Protein 2a*  
705 *Regulates Angiogenic Lumen Formation via Weibel-Palade Body Apical*  
706 *Secretion of Angiopoietin-2*. Arterioscler Thromb Vasc Biol, 2021: p.  
707 Atvbaha121316113.
  - 708 8. Gross, S.J., et al., *Notch regulates vascular collagen IV basement membrane*  
709 *through modulation of lysyl hydroxylase 3 trafficking*. *Angiogenesis*, 2021.
  - 710 9. Agola, J.O., et al., *Rab GTPases as regulators of endocytosis, targets of disease*  
711 *and therapeutic opportunities*. Clin Genet, 2011. **80**(4): p. 305-18.
  - 712 10. Jovic, M., et al., *The early endosome: a busy sorting station for proteins at the*  
713 *crossroads*. Histo Histopathol, 2010. **25**(1): p. 99-112.
  - 714 11. Kaksonen, M. and A. Roux, *Mechanisms of clathrin-mediated endocytosis*. Nat  
715 *Rev Mol Cell Biol*, 2018. **19**(5): p. 313-326.
  - 716 12. Hutagalung, A.H. and P.J. Novick, *Role of Rab GTPases in membrane traffic and*  
717 *cell physiology*. Physiol Rev, 2011. **91**(1): p. 119-49.
  - 718 13. Pfeffer, S., *A model for Rab GTPase localization*. Biochem Soc Trans, 2005.  
719 **33**(Pt 4): p. 627-30.
  - 720 14. Klinkert, K. and A. Echard, *Rab35 GTPase: A Central Regulator of*  
721 *Phosphoinositides and F-actin in Endocytic Recycling and Beyond*. Traffic, 2016.  
722 **17**(10): p. 1063-77.
  - 723 15. Mrozowska, P.S. and M. Fukuda, *Regulation of podocalyxin trafficking by Rab*  
724 *small GTPases in 2D and 3D epithelial cell cultures*. J Cell Biol, 2016. **213**(3): p.  
725 355-69.
  - 726 16. Klinkert, K., et al., *Rab35 GTPase couples cell division with initiation of epithelial*  
727 *apico-basal polarity and lumen opening*. Nature Communications, 2016. **7**(1): p.  
728 11166.
  - 729 17. Kobayashi, H. and M. Fukuda, *Rab35 regulates Arf6 activity through centaurin-*  
730  *$\beta$ 2 (ACAP2) during neurite outgrowth*. J Cell Sci, 2012. **125**(Pt 9): p. 2235-43.
  - 731 18. Miyamoto, Y., et al., *Rab35, acting through ACAP2 switching off Arf6, negatively*  
732 *regulates oligodendrocyte differentiation and myelination*. Mol Biol Cell, 2014.  
733 **25**(9): p. 1532-42.



- 734 19. Bhat, S., et al., *Rab35 and its effectors promote formation of tunneling nanotubes*  
735 *in neuronal cells*. Scientific Reports, 2020. **10**(1): p. 16803.
- 736 20. Rahajeng, J., et al., *MICAL-L1 is a tubular endosomal membrane hub that*  
737 *connects Rab35 and Arf6 with Rab8a*. Traffic, 2012. **13**(1): p. 82-93.
- 738 21. Frémont, S., et al., *Oxidation of F-actin controls the terminal steps of cytokinesis*.  
739 Nature Communications, 2017. **8**(1): p. 14528.
- 740 22. Zhang, J., et al., *Rab35 controls actin bundling by recruiting fascin as an effector*  
741 *protein*. Science, 2009. **325**(5945): p. 1250-4.
- 742 23. Rensburg, C., M. Testa, and J.L. Song, *Rab35 regulates skeletogenesis and*  
743 *gastrulation by facilitating actin remodeling and vesicular trafficking*. Cells Dev,  
744 2021. **165**.
- 745 24. Campeau, E., et al., *A versatile viral system for expression and depletion of*  
746 *proteins in mammalian cells*. PLoS One, 2009. **4**(8): p. e6529.
- 747 25. Nakatsu, M.N., J. Davis, and C.C. Hughes, *Optimized fibrin gel bead assay for*  
748 *the study of angiogenesis*. J Vis Exp., 2007(3): p. 186. doi: 10.3791/186. Epub  
749 2007 Apr 29.
- 750 26. Nakatsu, M.N. and C.C. Hughes, *An optimized three-dimensional in vitro model*  
751 *for the analysis of angiogenesis*. Methods Enzymol., 2008. **443:65-82**.(doi): p.  
752 10.1016/S0076-6879(08)02004-1.
- 753 27. Kushner, E.J., et al., *Excess centrosomes disrupt endothelial cell migration via*  
754 *centrosome scattering*. J Cell Biol, 2014. **206**(2): p. 257-72.
- 755 28. Francis, C.R. and E.J. Kushner, *Capturing membrane trafficking events during*  
756 *3D angiogenic development in vitro*. Microcirculation, 2021: p. e12726.
- 757 29. Chesneau, L., et al., *An ARF6/Rab35 GTPase cascade for endocytic recycling*  
758 *and successful cytokinesis*. Curr Biol, 2012. **22**(2): p. 147-53.
- 759 30. Dambournet, D., et al., *Rab35 GTPase and OCRL phosphatase remodel lipids*  
760 *and F-actin for successful cytokinesis*. Nature Cell Biology, 2011. **13**(8): p. 981-  
761 988.
- 762 31. Kouranti, I., et al., *Rab35 regulates an endocytic recycling pathway essential for*  
763 *the terminal steps of cytokinesis*. Curr Biol, 2006. **16**(17): p. 1719-25.
- 764 32. Biesemann, A., et al., *Rab35 protein regulates evoked exocytosis of endothelial*  
765 *Weibel-Palade bodies*. J Biol Chem, 2017. **292**(28): p. 11631-11640.
- 766 33. Jackson, T.R., et al., *ACAPs are arf6 GTPase-activating proteins that function in*  
767 *the cell periphery*. J Cell Biol, 2000. **151**(3): p. 627-38.
- 768 34. Cauvin, C., et al., *Rab35 GTPase Triggers Switch-like Recruitment of the Lowe*  
769 *Syndrome Lipid Phosphatase OCRL on Newborn Endosomes*. Curr Biol, 2016.  
770 **26**(1): p. 120-8.
- 771 35. Lin, L., et al., *Rab35/ACAP2 and Rab35/RUSC2 Complex Structures Reveal*  
772 *Molecular Basis for Effector Recognition by Rab35 GTPase*. Structure, 2019.  
773 **27**(5): p. 729-740.e3.
- 774 36. Powelka, A.M., et al., *Stimulation-dependent recycling of integrin beta1 regulated*  
775 *by ARF6 and Rab11*. Traffic, 2004. **5**(1): p. 20-36.
- 776 37. Boshans, R.L., et al., *ADP-ribosylation factor 6 regulates actin cytoskeleton*  
777 *remodeling in coordination with Rac1 and RhoA*. Mol Cell Biol, 2000. **20**(10): p.  
778 3685-94.

- 779 38. Al-Awar, O., et al., *Separation of membrane trafficking and actin remodeling*  
780 *functions of ARF6 with an effector domain mutant*. Mol Cell Biol, 2000. **20**(16): p.  
781 5998-6007.
- 782 39. Parachoniak, C.A., et al., *GGA3 functions as a switch to promote Met receptor*  
783 *recycling, essential for sustained ERK and cell migration*. Dev Cell, 2011. **20**(6):  
784 p. 751-63.
- 785 40. Marat, A.L. and P.S. McPherson, *The connectenn family, Rab35 guanine*  
786 *nucleotide exchange factors interfacing with the clathrin machinery*. J Biol Chem,  
787 2010. **285**(14): p. 10627-37.
- 788 41. Marat, A.L., M.S. Ioannou, and P.S. McPherson, *Connectenn 3/DENND1C binds*  
789 *actin linking Rab35 activation to the actin cytoskeleton*. Mol Biol Cell, 2012.  
790 **23**(1): p. 163-75.
- 791 42. Chaineau, M., M.S. Ioannou, and P.S. McPherson, *Rab35: GEFs, GAPs and*  
792 *effectors*. Traffic, 2013. **14**(11): p. 1109-17.
- 793 43. Allaire, P.D., et al., *The Connectenn DENN domain: a GEF for Rab35 mediating*  
794 *cargo-specific exit from early endosomes*. Mol Cell, 2010. **37**(3): p. 370-82.
- 795 44. Mullins, R.D., J.A. Heuser, and T.D. Pollard, *The interaction of Arp2/3 complex*  
796 *with actin: nucleation, high affinity pointed end capping, and formation of*  
797 *branching networks of filaments*. Proc Natl Acad Sci U S A, 1998. **95**(11): p.  
798 6181-6.
- 799 45. Mullins, R.D., J.A. Heuser, and T.D. Pollard, *The interaction of Arp2/3 complex*  
800 *with actin: Nucleation, high affinity pointed end capping, and formation of*  
801 *branching networks of filaments*. Proceedings of the National Academy of  
802 Sciences, 1998. **95**(11): p. 6181-6186.
- 803 46. Hetrick, B., et al., *Small molecules CK-666 and CK-869 inhibit actin-related*  
804 *protein 2/3 complex by blocking an activating conformational change*. Chem Biol,  
805 2013. **20**(5): p. 701-12.
- 806 47. Farrants, H., et al., *Chemogenetic Control of Nanobodies*. Nat Methods, 2020.  
807 **17**(3): p. 279-282.
- 808 48. Morozova, K.S., et al., *Far-red fluorescent protein excitable with red lasers for*  
809 *flow cytometry and superresolution STED nanoscopy*. Biophys J, 2010. **99**(2): p.  
810 L13-5.
- 811 49. Lauffenburger, D.A. and A.F. Horwitz, *Cell migration: a physically integrated*  
812 *molecular process*. Cell, 1996. **84**(3): p. 359-69.
- 813 50. Svitkina, T.M. and G.G. Borisy, *Arp2/3 complex and actin depolymerizing*  
814 *factor/cofilin in dendritic organization and treadmilling of actin filament array in*  
815 *lamellipodia*. J Cell Biol, 1999. **145**(5): p. 1009-26.
- 816 51. Barry, D.J., et al., *Open source software for quantification of cell migration,*  
817 *protrusions, and fluorescence intensities*. J Cell Biol, 2015. **209**(1): p. 163-80.
- 818 52. Milligan, R.A., M. Whittaker, and D. Safer, *Molecular structure of F-actin and*  
819 *location of surface binding sites*. Nature, 1990. **348**(6298): p. 217-221.
- 820 53. Lee, Chi W., et al., *Dynamic Localization of G-Actin during Membrane Protrusion*  
821 *in Neuronal Motility*. Current Biology, 2013. **23**(12): p. 1046-1056.
- 822 54. Hoshijima, K., et al., *Highly Efficient CRISPR-Cas9-Based Methods for*  
823 *Generating Deletion Mutations and F0 Embryos that Lack Gene Function in*  
824 *Zebrafish*. Dev Cell, 2019. **51**(5): p. 645-657.e4.

- 825 55. White, R.M., et al., *Transparent adult zebrafish as a tool for in vivo*  
826 *transplantation analysis*. Cell Stem Cell, 2008. **2**(2): p. 183-9.
- 827 56. Pfeffer, S. and D. Aivazian, *Targeting Rab GTPases to distinct membrane*  
828 *compartments*. Nat Rev Mol Cell Biol, 2004. **5**(11): p. 886-96.
- 829 57. Gebala, V., et al., *Blood flow drives lumen formation by inverse membrane*  
830 *blebbing during angiogenesis in vivo*. Nat Cell Biol, 2016. **18**(4): p. 443-50.
- 831 58. Phng, L.K., et al., *Formin-mediated actin polymerization at endothelial junctions*  
832 *is required for vessel lumen formation and stabilization*. Dev Cell, 2015. **32**(1): p.  
833 123-32.
- 834 59. Paatero, I., et al., *Junction-based lamellipodia drive endothelial cell*  
835 *rearrangements in vivo via a VE-cadherin-F-actin based oscillatory cell-cell*  
836 *interaction*. Nature Communications, 2018. **9**(1): p. 3545.
- 837 60. van Geemen, D., et al., *F-actin-anchored focal adhesions distinguish endothelial*  
838 *phenotypes of human arteries and veins*. Arterioscler Thromb Vasc Biol, 2014.  
839 **34**(9): p. 2059-67.
- 840 61. Norden, P.R., Z. Sun, and G.E. Davis, *Control of endothelial tubulogenesis by*  
841 *Rab and Ral GTPases, and apical targeting of caveolin-1-labeled vacuoles*.  
842 PLoS One, 2020. **15**(6): p. e0235116.
- 843 62. Iruela-Arispe, M.L. and G.E. Davis, *Cellular and molecular mechanisms of*  
844 *vascular lumen formation*. Dev Cell, 2009. **16**(2): p. 222-31.
- 845 63. Bayless, K.J. and G.A. Johnson, *Role of the cytoskeleton in formation and*  
846 *maintenance of angiogenic sprouts*. J Vasc Res, 2011. **48**(5): p. 369-85.
- 847 64. Barry, D.M., et al., *Rasip1-Mediated Rho GTPase Signaling Regulates Blood*  
848 *Vessel Tubulogenesis via Nonmuscle Myosin II*. Circ Res, 2016. **119**(7): p. 810-  
849 26.
- 850 65. Barry, D.M., et al., *Cdc42 is required for cytoskeletal support of endothelial cell*  
851 *adhesion during blood vessel formation in mice*. Development, 2015. **142**(17): p.  
852 3058-70.
- 853 66. Kondrychyn, I., et al., *Marcks11 modulates endothelial cell mechanoresponse to*  
854 *haemodynamic forces to control blood vessel shape and size*. Nat Commun,  
855 2020. **11**(1): p. 5476.
- 856 67. Norden, P.R., et al., *Cdc42 and k-Ras Control Endothelial Tubulogenesis through*  
857 *Apical Membrane and Cytoskeletal Polarization: Novel Stimulatory Roles for*  
858 *GTPase Effectors, the Small GTPases, Rac2 and Rap1b, and Inhibitory*  
859 *Influence of Arhgap31 and Rasa1*. PLoS One, 2016. **11**(1): p. e0147758.
- 860 68. Villagomez, F.R., et al., *The role of the oncogenic Rab35 in cancer invasion,*  
861 *metastasis, and immune evasion, especially in leukemia*. Small GTPases, 2018:  
862 p. 1-12.
- 863 69. Gibson, D.G., et al., *Enzymatic assembly of DNA molecules up to several*  
864 *hundred kilobases*. Nat Methods, 2009. **6**(5): p. 343-5.
- 865 70. Webb, A.M., et al., *EHD2 modulates Dll4 endocytosis during blood vessel*  
866 *development*. Microcirculation, 2021: p. e12740.
- 867 71. Li, P., R.M. White, and L.I. Zon, *Transplantation in zebrafish*. Methods Cell Biol,  
868 2011. **105**: p. 403-17.
- 869 72. Kawakami, K., *Tol2: a versatile gene transfer vector in vertebrates*. Genome Biol,  
870 2007. **8 Suppl 1**(Suppl 1): p. S7.

- 871 73. Suster, M.L., et al., *Transgenesis in zebrafish with the tol2 transposon system*.  
872 *Methods Mol Biol.*, 2009. **561:41-63**.(doi): p. 10.1007/978-1-60327-019-9\_3.  
873 74. Balciunas, D., et al., *Harnessing a high cargo-capacity transposon for genetic*  
874 *applications in vertebrates*. *PLoS Genet*, 2006. **2(11)**: p. e169.  
875 75. Watanabe, K., et al., *Networks of polarized actin filaments in the axon initial*  
876 *segment provide a mechanism for sorting axonal and dendritic proteins*. *Cell*  
877 *Rep*, 2012. **2(6)**: p. 1546-53.  
878  
879  
880  
881



882 **FIGURES**

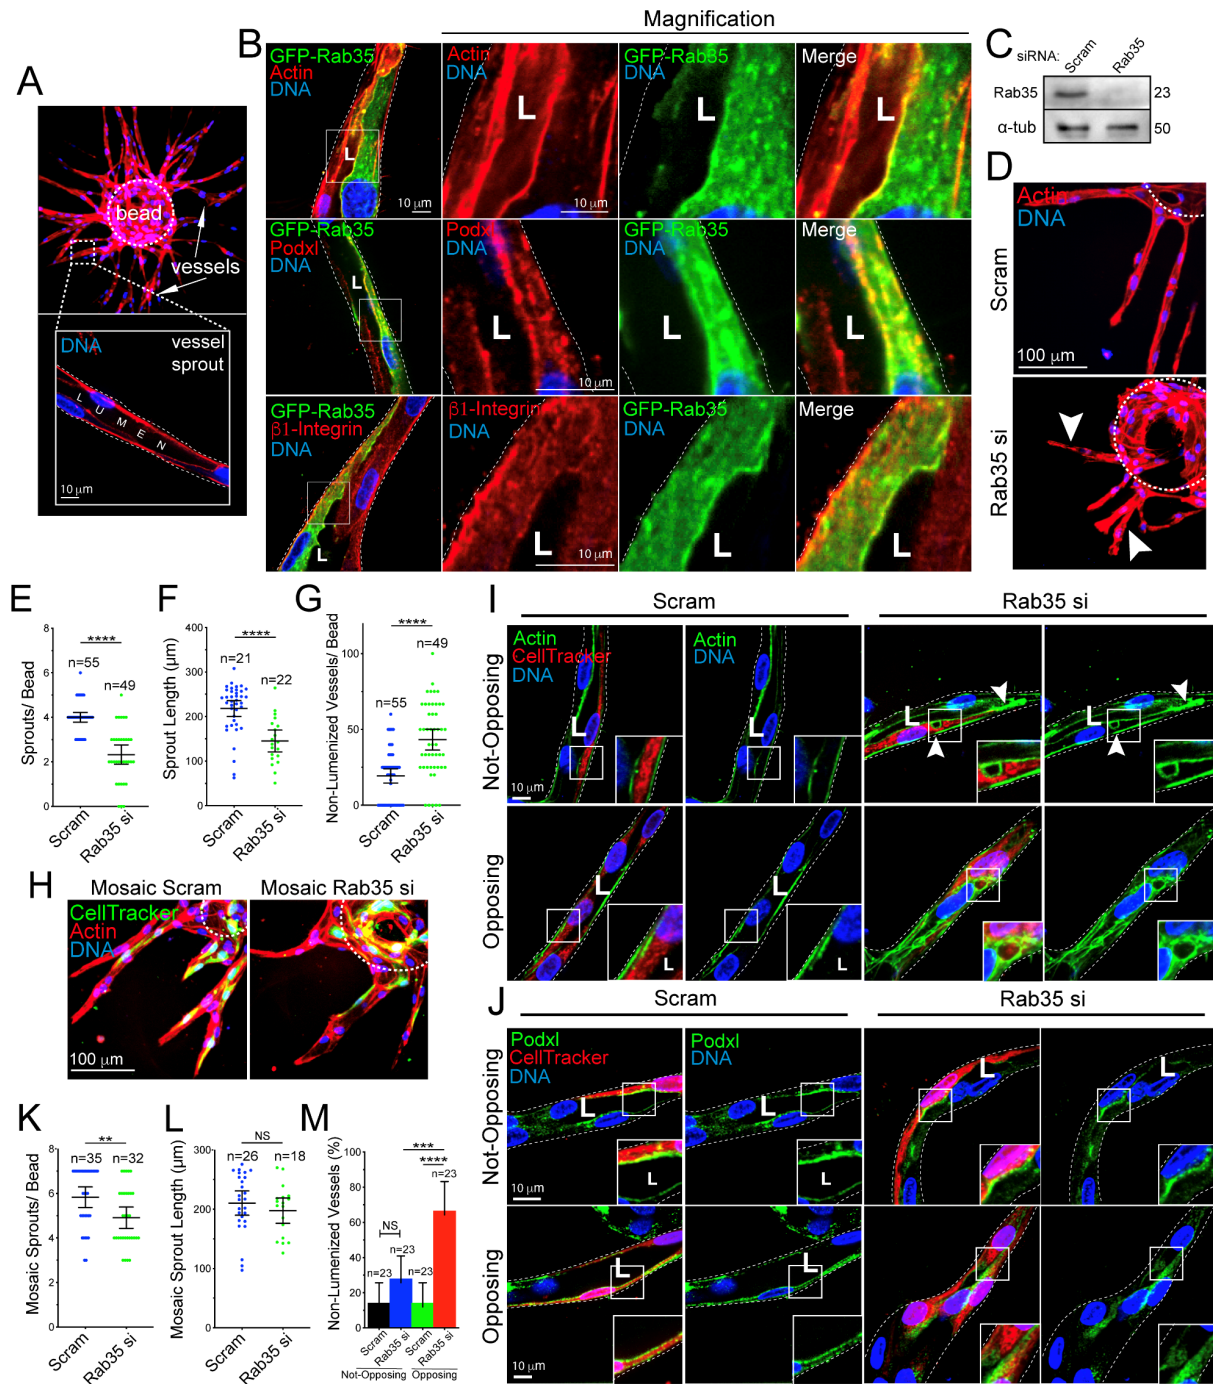

883  
884  
885  
886  
887  
888  
889  
890

**Figure 1. Rab35 is an apical membrane protein required for sprout formation.** (A) Representative images of the fibrin-bead assay (FBA) at low and high magnification. Arrows mark sprout structures. Inset depicts lumenized sprout. (B) GFP-Rab35 localization in endothelial sprouts with actin (top panels), podocalyxin (Podxl, middle panels), and  $\beta$ 1-integrin (bottom panels). (C) Western blot confirmation of siRNA knockdown of Rab35. (D) Representative image of scramble (Scram) control and Rab35 siRNA (si) knock-down (KD) sprouts. Arrowheads denote

891 short and non-lumenized sprouts. Dashed lines outline the microbead. **(E-G)** Graphs of indicated  
892 sprouting parameters between groups. **(H)** Representative images of sprout morphology of  
893 mosaic Scram and Rab35 KD cells, green indicates cell tracker of siRNA treated cells. **(I,J)**  
894 Representative images of non-opposing (top panels, an isolated siRNA treated cell) and opposing  
895 (bottom panels, two adjacent siRNA treated cells) cells stained as indicated. Arrowheads denote  
896 aberrant actin accumulations **(K-M)** Quantification of indicated parameters across groups. In all  
897 images L denotes lumen. \*\*  $p < 0.01$ , \*\*\*  $p < 0.001$ , \*\*\*\*  $p < 0.0001$ , NS=Non-Significant. Error bars  
898 represent 95% confidence intervals. N=number of sprouts. Insets are areas of higher  
899 magnification. White dotted lines mark sprout exterior. All experiments were done using Human  
900 umbilical vein endothelial cells in triplicate.

901  
902  
903  
904  
905  
906  
907  
908  
909  
910  
911  
912  
913  
914  
915  
916  
917  
918  
919  
920  
921  
922  
923  
924  
925  
926  
927  
928  
929  
930  
931  
932  
933  
934  
935  
936  
937  
938  
939  
940  
941

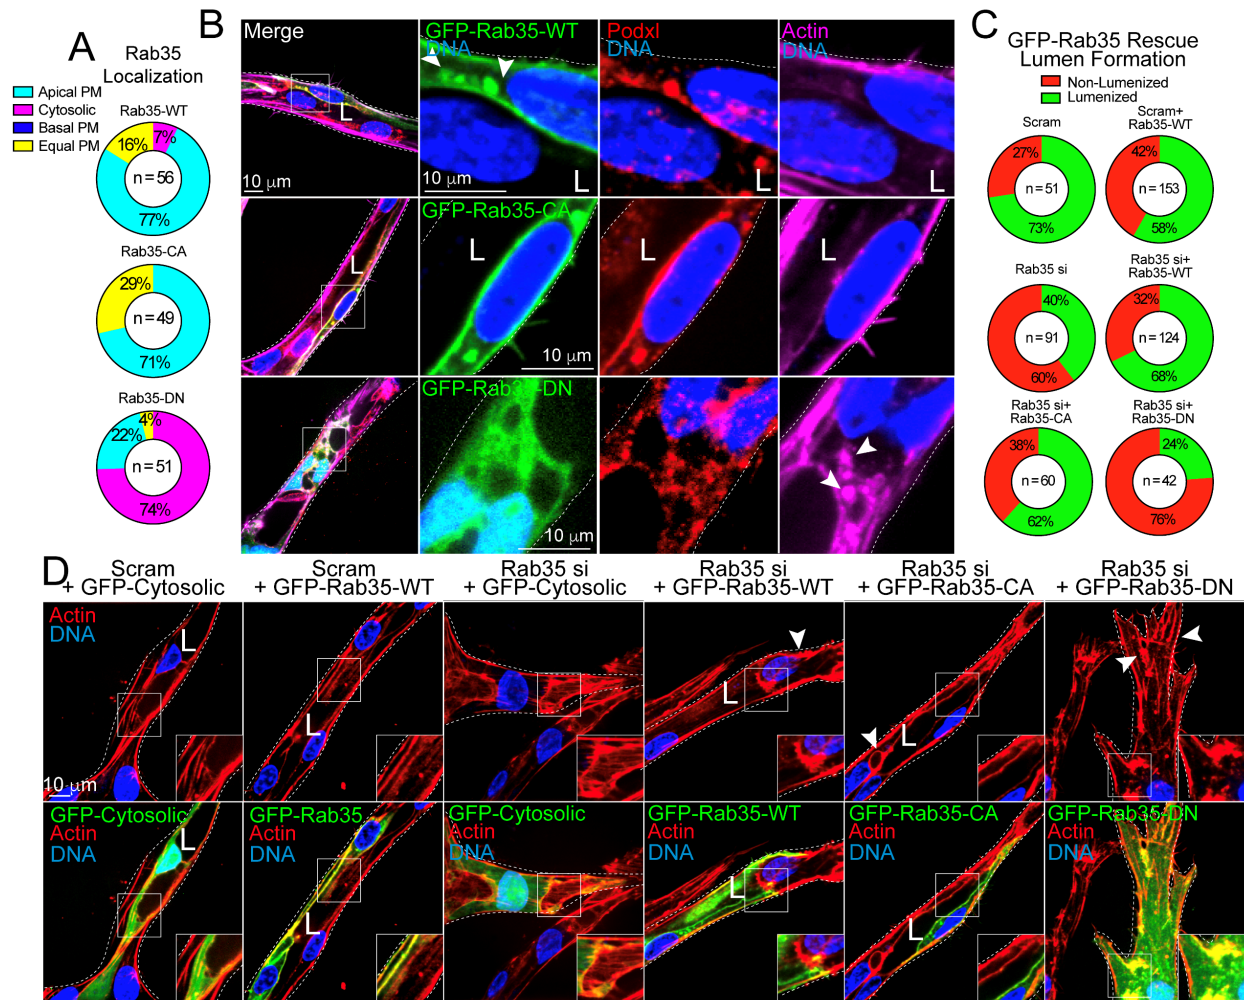

942  
943  
944  
945  
946  
947  
948  
949  
950  
951  
952  
953  
954  
955  
956  
957  
958  
959  
960

**Figure 2. Rab35 mutant localization and rescue in endothelial sprouts.** (A) Quantification of GFP-Rab35 wild-type (WT), constitutively active (CA), and dominant-negative (DN) localization in endothelial sprouts. Apical plasma membrane (PM, uniformly localized to apical membrane), basal PM (Rab35 uniformly located at the basal membrane), cytosolic (localized in the cytoplasm), equal PM (Rab35 equally distributed between the apical and basal membranes). N= number of cells. (B) GFP-Rab35 WT (top panels), CA (middle panels), and DN (bottom panels) localization in endothelial sprouts. Co-staining with Podocalyxin (Podxl) and actin. Arrowheads in top panels denote Rab35 apical localization and puncta. Arrowheads in bottom panels denote abnormal accumulations of actin. (C) Quantification of lumen formation in described conditions. N=number of sprouts. (D) Representative images of Rab35 KD sprouts rescued with either GFP-cytosolic, (control), or GFP-Rab35-WT/CA/DN. Arrowheads denote actin accumulations. White dotted lines mark sprout exterior. L denotes lumen in all images. Insets are areas of higher magnification. All experiments were done using Human umbilical vein endothelial cells in triplicate.



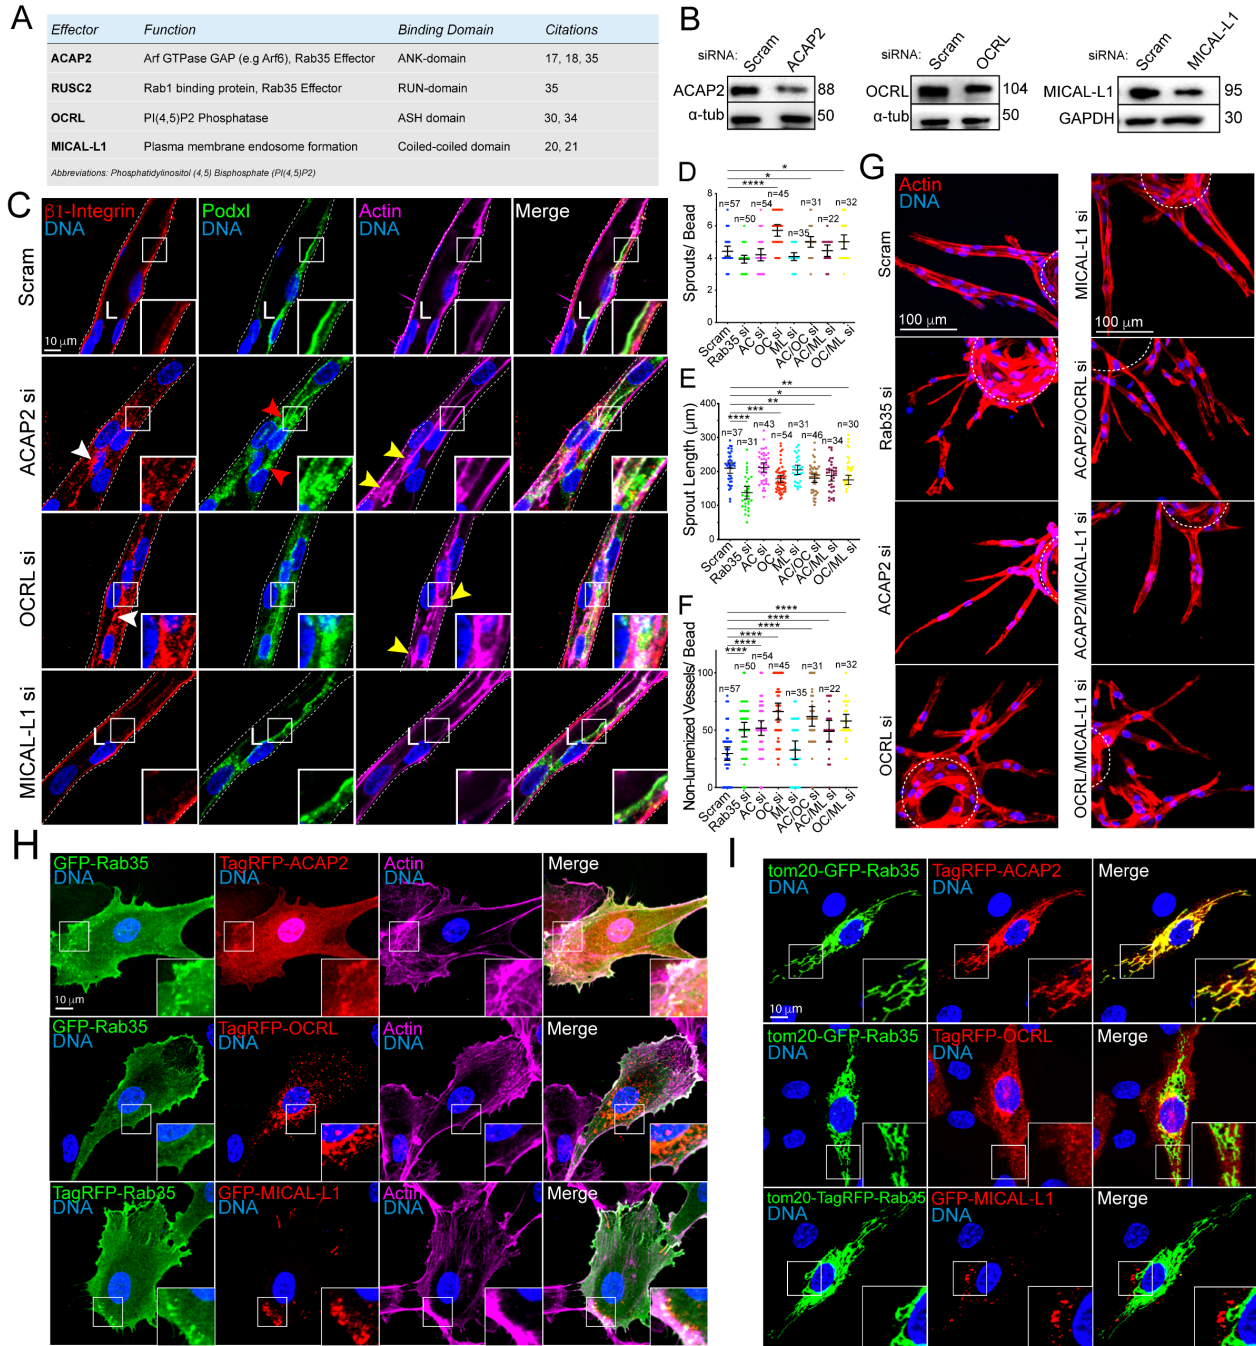

961  
962  
963  
964  
965  
966  
967  
968  
969  
970

**Figure 3. Rab35 effector localization and necessity to endothelial sprout formation.** (A) Table listing each effector, respective function, and citations. (B) ACAP2, OCRL, and MICAL-L1 knockdown (KD) validation by western blotting. (C) Representative images of siRNA (si)-mediated KD of each effector. White arrowhead denotes abnormal localization of  $\beta$ 1-integrin. Red arrowheads denote abnormal podocalyxin (Podxl) localization. Yellow arrowheads denote abnormal actin accumulations. White dotted lines mark sprout exterior. (D-F) Graphs of indicated sprout parameters between groups. ACAP2 (AC), OCRL (OC), and MICAL-L1 (ML). N= number of sprouts. (G) Representative images of sprout morphology between indicated groups. Dashed



971 lines outline microbeads. **(H)** Two-dimensional localization of GFP-Rab35 or TagRFP-Rab35 with  
972 indicated effectors and stained for actin. **(I)** Representative images of mitochondrial mis-  
973 localization experiment. Rab35 was unnaturally tethered to the mitochondria with a tom20 N-  
974 terminal tag to test if indicated effectors were also mislocalized to the mitochondria. In all images  
975 L denotes lumen. \*  $p < 0.05$ , \*\*  $p < 0.01$ , \*\*\*  $p < 0.001$ , \*\*\*\*  $p < 0.0001$ , NS=Non-Significant. Error  
976 bars represent 95% confidence intervals. N=number of sprouts. Insets are areas of higher  
977 magnification. All experiments were done using Human umbilical vein endothelial cells in  
978 triplicate.

979  
980  
981  
982  
983  
984  
985  
986  
987  
988  
989  
990  
991  
992  
993  
994  
995  
996  
997  
998  
999

1000  
1001  
1002  
1003  
1004  
1005  
1006  
1007  
1008  
1009  
1010  
1011  
1012  
1013  
1014  
1015  
1016  
1017  
1018  
1019  
1020  
1021

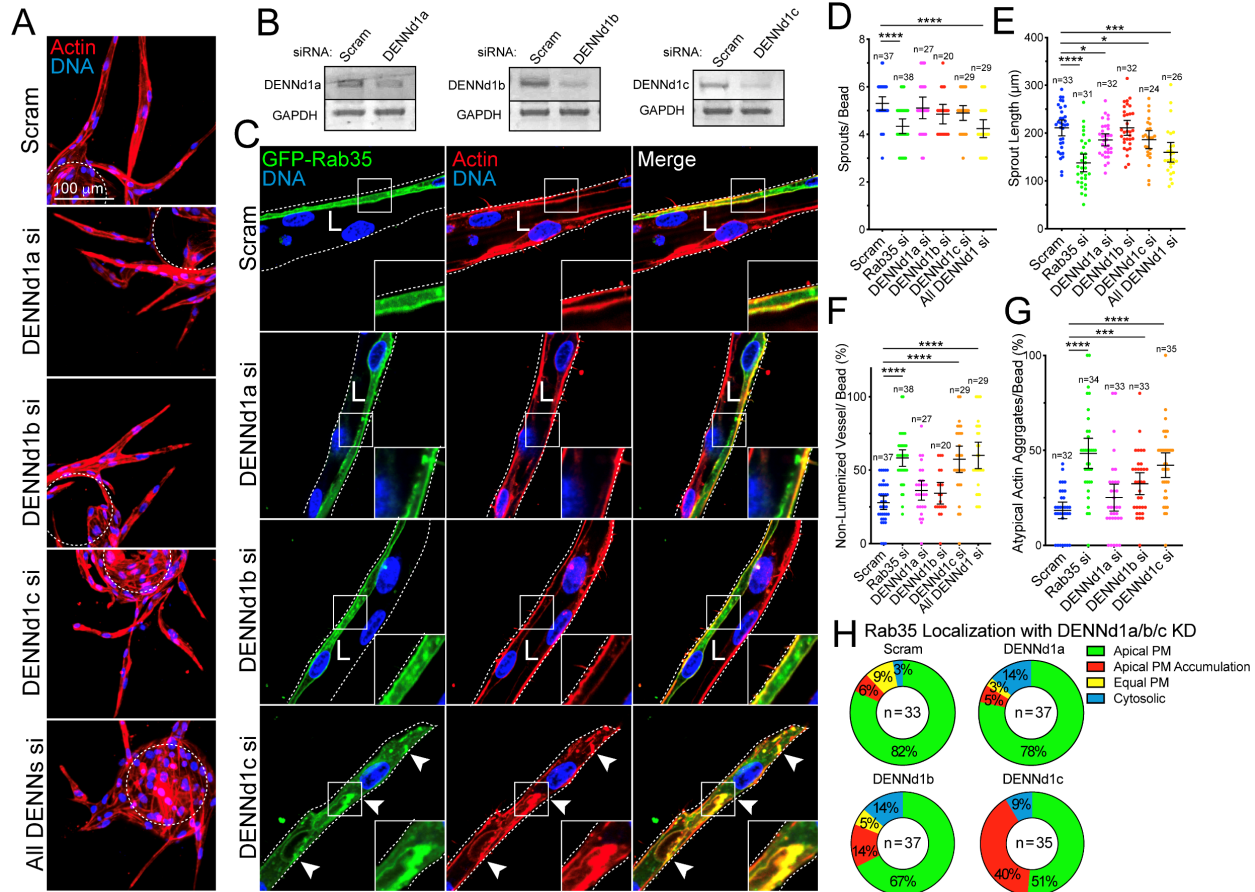

1022  
1023  
1024  
1025  
1026  
1027  
1028  
1029  
1030  
1031  
1032  
1033  
1034  
1035  
1036  
1037  
1038  
1039  
1040  
1041  
1042  
1043  
1044  
1045

**Figure 4. DENNd1c is required for sprouting and Rab35 function.** (A) Sprout morphology of scramble (Scram), DENNd1a-c and combined siRNA (si)-treated sprouts, stained with actin to denote the general morphology. Dashed line denotes microbead. (B) Knockdown confirmations for DENNd1a-c by RT-PCR. (C) Representative images of siRNA knockdowns described in A with GFP-Rab35 localization. L denotes lumen and arrowheads denote abnormal actin accumulations. White dotted lines mark sprout exterior. (D-G) Graphs of indicated sprout parameters across groups. N=number of sprouts. (H) GFP-Rab35 localization in DENNd1a-c siRNA-treated sprouts. Localizations were binned to apical plasma membrane (PM, Rab35 >80% at apical membrane), apical PM accumulations (non-continuous, visible puncta), equal PM (equally enriched at apical and basal membranes), and cytosolic. N=number of sprouts. \*  $p < 0.05$ , \*\*\*  $p < 0.001$ , \*\*\*\*  $p < 0.0001$ , NS=Non-Significant. Error bars represent 95% confidence intervals. Insets are areas of higher magnification. All experiments were done using Human umbilical vein endothelial cells in triplicate.

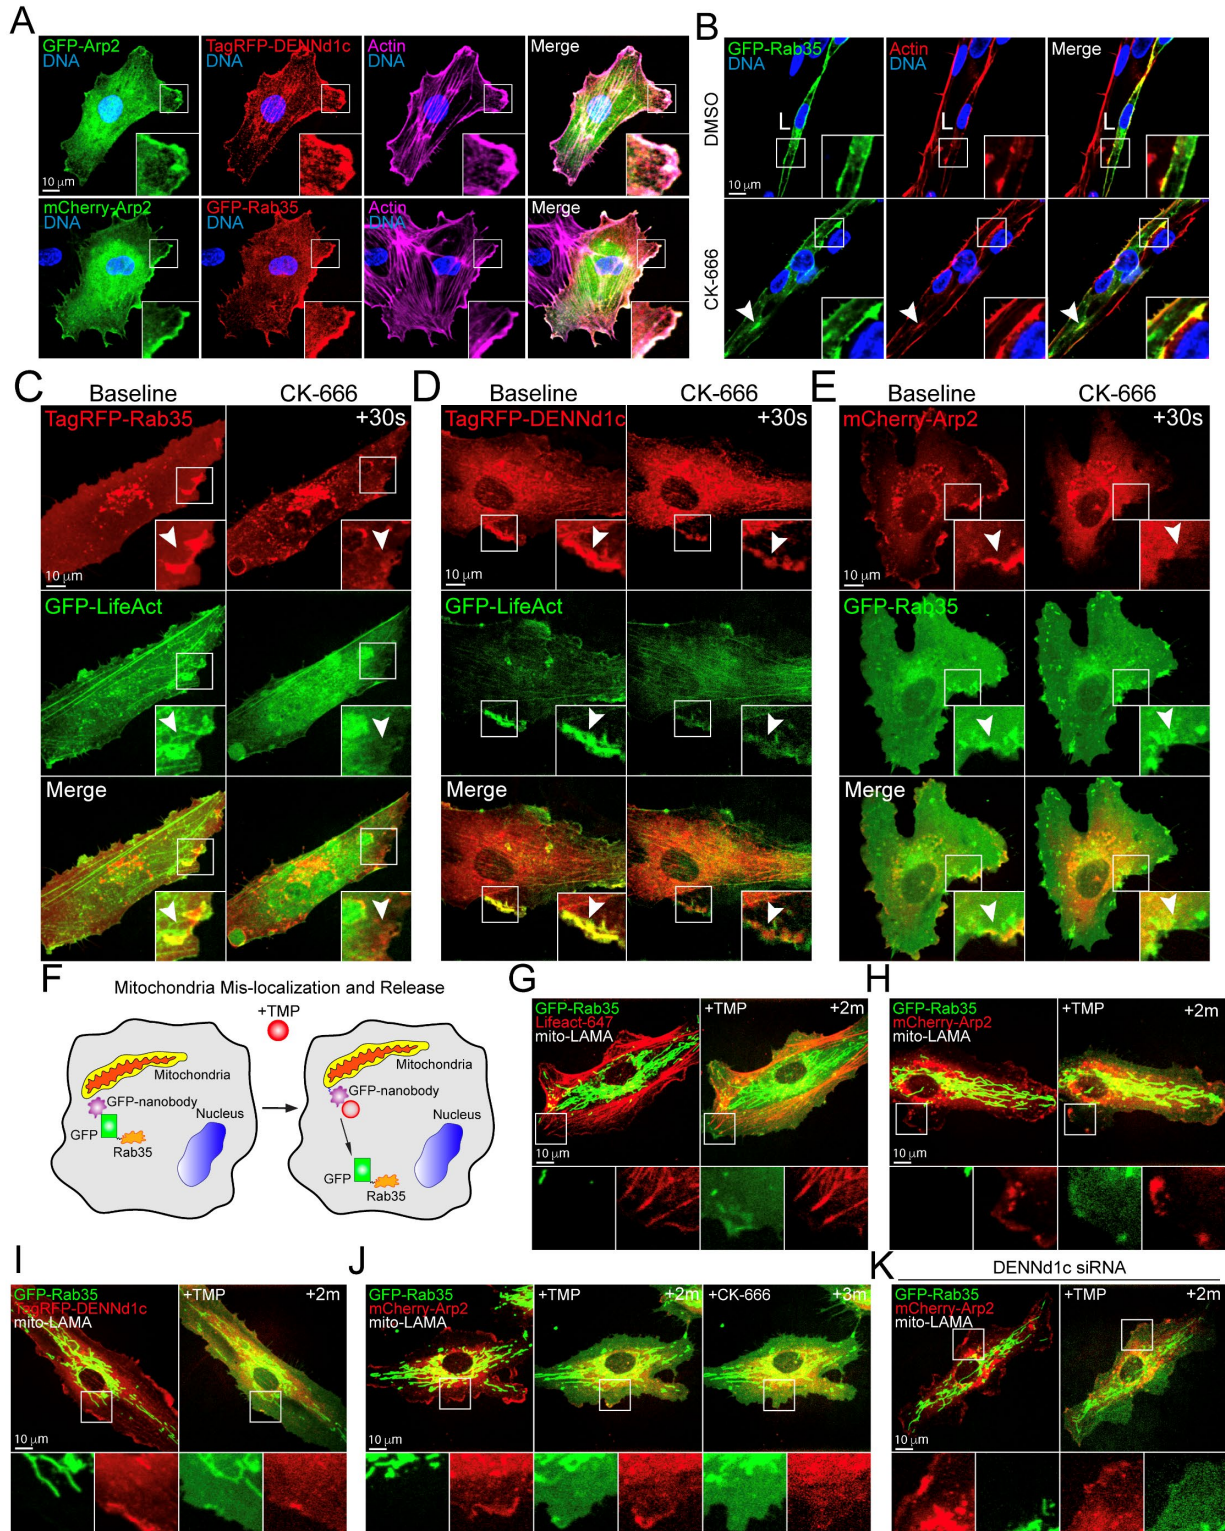

1046  
1047  
1048  
1049  
1050

**Figure 5. Rab35 localizes to cortical actin.** (A) Two-dimensional localization of GFP-Arp2 with DENNd1c (top panels) and GFP-Rab35 (bottom panels). (B) Representative images of DMSO and CK-666 (Arp Inhibitor) treated sprouts expressing GFP-Rab35. L denotes lumen. (C,D) Live

1051 imaging of GFP-Rab35 or tagRFP-DENNd1c with TagRFP647-LifeAct at baseline and after  
1052 treatment with CK-666. White arrowheads denote disappearance of Rab35 puncta over time. **(E)**  
1053 Representative live-images of a cell expressing mCherry-Arp2 and GFP-Rab35 before and after  
1054 CK-666 treatment White arrowheads denote disappearance of Rab35 puncta over time. **(F)**  
1055 Cartoon of a mitochondria-localized GFP-nanobody and controlled release of GFP-Rab35 upon  
1056 treatment with Trimethoprim (TMP). In the absence of TMP the nanobody sequesters GFP or  
1057 GFP-tagged proteins. In the presence of TMP the GFP cargo is released. **(G)** Live-image of a cell  
1058 expressing GFP-Rab35, TagRFP647 (647)-LifeAct and ligand-modulated antibody fragments  
1059 targeted to the mitochondria (mito-LAMA) before and after TMP administration. **(H)** Live-image of  
1060 a cell expressing GFP-Rab35, mCherry-Arp2 and mito-LAMA before and after TMP  
1061 administration. **(I)** Live-image of a cell expressing GFP-Rab35, TagRFP-DENNd1c and mito-  
1062 LAMA before and after TMP administration. **(J)** Live-image of a cell expressing GFP-Rab35,  
1063 mCherry-Arp2 and mito-LAMA before and after TMP administration and then treated with CK-  
1064 666. **(K)** Live-image of a cell expressing GFP-Rab35, mCherry-Arp2 and mito-LAMA treated with  
1065 DENNd1c siRNA (si) before and after TMP administration. Insets are areas of higher  
1066 magnification. All experiments were done using Human umbilical vein endothelial cells in  
1067 triplicate.

1068  
1069  
1070  
1071  
1072  
1073  
1074  
1075  
1076  
1077  
1078  
1079  
1080  
1081  
1082  
1083  
1084  
1085  
1086  
1087  
1088  
1089  
1090  
1091  
1092  
1093  
1094  
1095  
1096  
1097  
1098  
1099  
1100  
1101



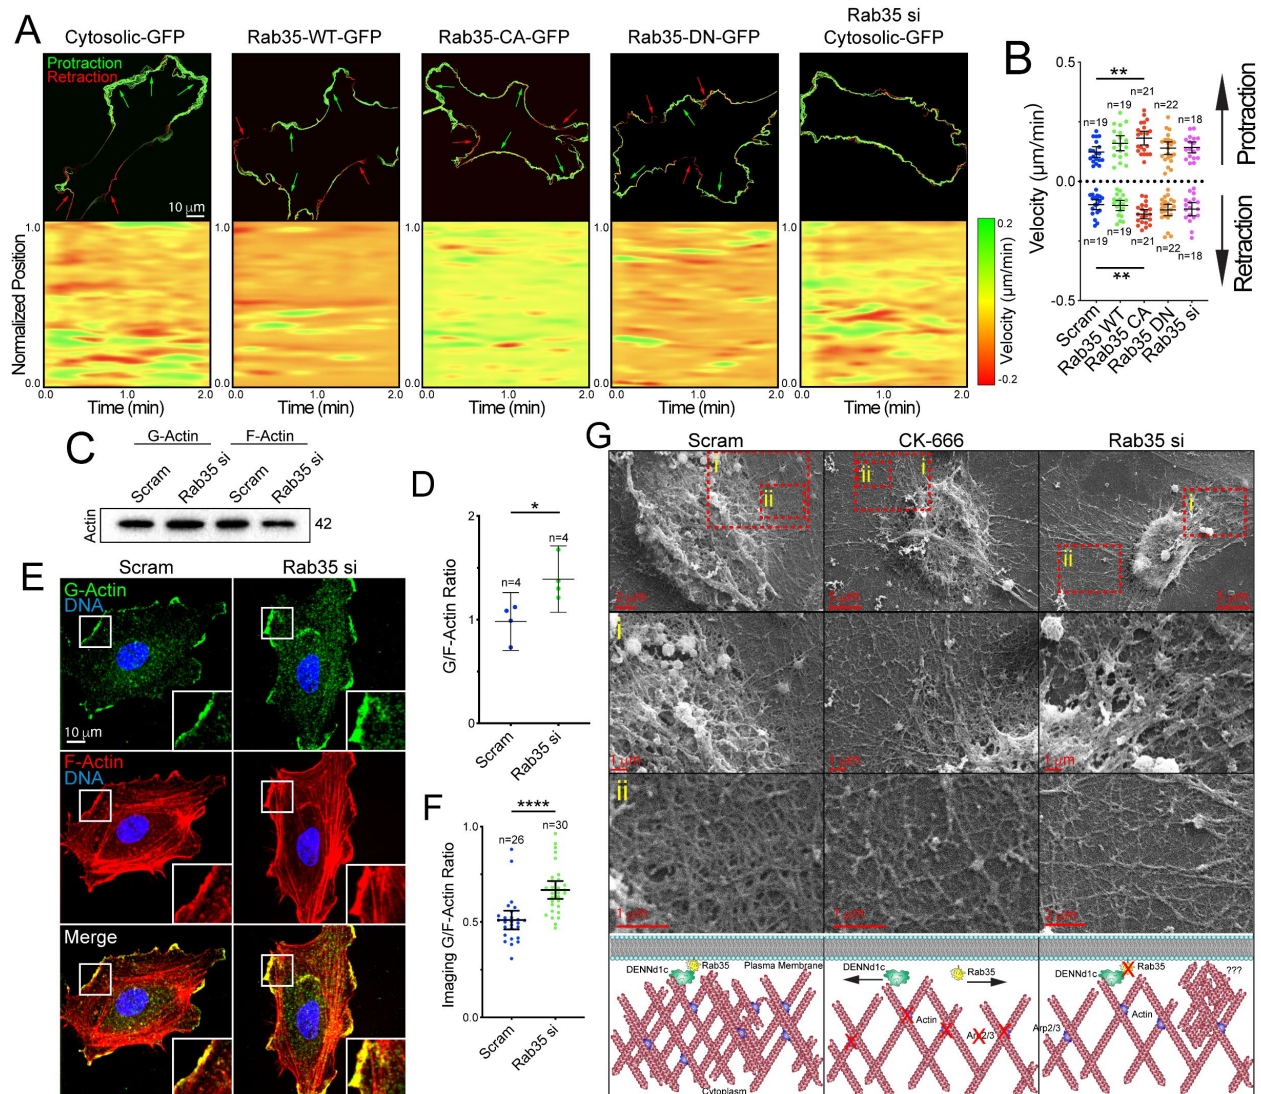

1102  
1103  
1104  
1105  
1106  
1107  
1108  
1109  
1110  
1111  
1112  
1113  
1114  
1115  
1116  
1117

**Figure 6. Rab35 regulates actin dynamics.** (A) Top panels depict change in membrane velocities over time in described conditions. Green represents protraction and red represents retraction of the membrane. Arrows indicate directionality. The bottom panels are heat maps in which the Red is indicative of retractive movement and green is protractive movement over time. Yellow indicates no change in velocity. (B) Quantification of cell membrane velocities between indicated groups. Above the dashed line is the protractive velocities and below the dashed line is retractive velocities. N=number of cells. (C) Western blot of globular and filamentous actin in siRNA (si)-treated groups. (D) Quantification of the ratio of globular to filamentous actin from blots represented in panel C. (E) Representative images of cells stained for globular and filamentous actin between indicated conditions. (F) Quantification of the ratio of globular to filamentous actin fluorescent intensities. (G) Scanning electron microscopy of filament network between groups. Top panel is the lowest magnification with higher magnifications in panels (i) and (ii). Bottom-cartoon representation of SEM filament network and hypothesized role of Rab35. \* p < 0.05, \*\* p < 0.01, \*\*\*\* p < 0.0001, NS=Non-Significant. Error bars represent 95% confidence intervals.

1118 Insets are areas of higher magnification. All experiments were done using Human umbilical vein  
1119 endothelial cells in triplicate.

1120  
1121  
1122  
1123  
1124  
1125  
1126  
1127  
1128  
1129  
1130  
1131  
1132  
1133  
1134  
1135  
1136  
1137  
1138  
1139  
1140  
1141  
1142  
1143  
1144  
1145  
1146  
1147  
1148  
1149  
1150  
1151  
1152  
1153  
1154  
1155  
1156  
1157  
1158  
1159  
1160  
1161  
1162  
1163  
1164  
1165  
1166  
1167  
1168



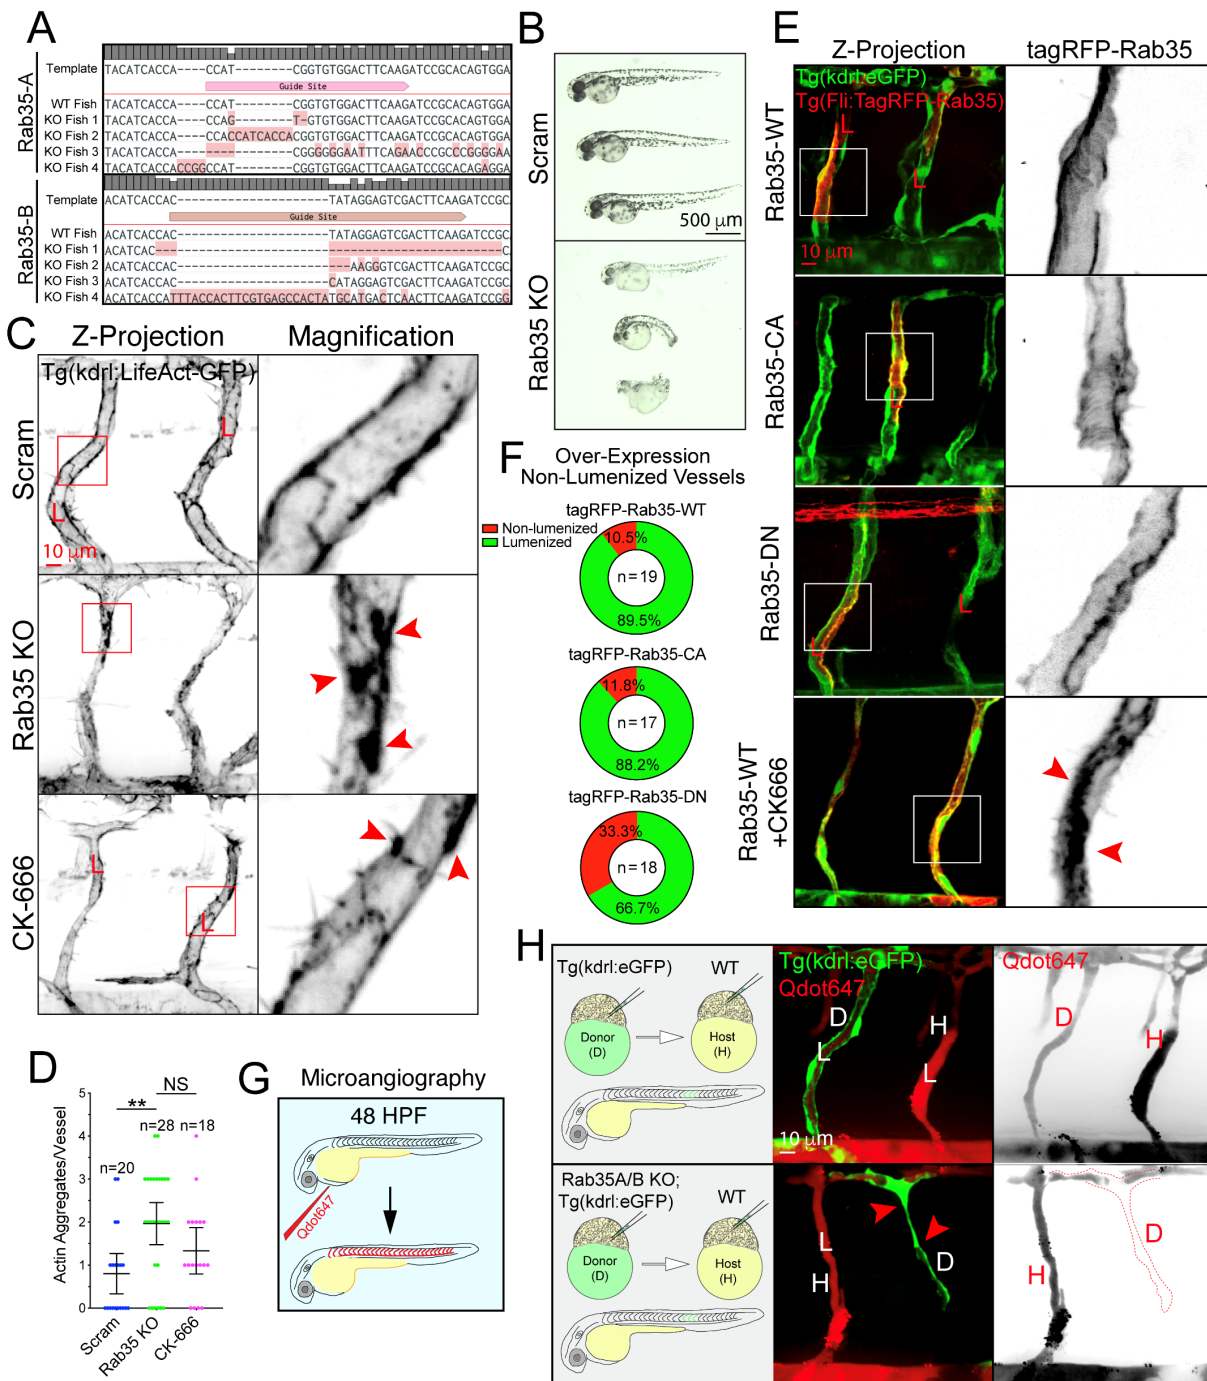

1169  
1170  
1171  
1172  
1173  
1174  
1175  
1176

**Figure 7. Rab35 is required for blood vessel development in zebrafish.** (A) CRISPR-mediated knockout of Rab35A/B confirmation by sequencing. Four random fish were sequenced following CRISPR/guide injections. (B) Zebrafish morphology at 48 hours post fertilization (hpf) post injection of scramble (Scram) and Rab35A/B CRISPR guides. (C) Representative images of intersomitic blood vessels (ISVs) of Scram and Rab35A/B knockout as well as CK-666 (Arp Inhibitor) treated zebrafish at 48 hpf expressing endothelial specific LifeAct-GFP. Red arrowheads

1177 indicate abnormal aggregates of actin. **(D)** Quantification of actin aggregates between groups. N=  
1178 number of ISVs. A minimum of 5 fish were used per group. **(E)** Representative images of mosaic  
1179 expression of Tag-RFP-Rab35 WT (top row), CA (second row), DN (third row) and WT with CK-  
1180 666 treatment in zebrafish at 48 hpf. Red arrowheads depict excess of Rab35 at the plasma  
1181 membrane. **(F)** Quantification of non-lumenized vessels at 48 hpf between groups mentioned in  
1182 panel E. **(G)** Cartoon representation of microangiography in zebrafish larvae using quantum dots  
1183 647 (Qdot647) at 48 hpf. **(H)** Representative images of ISVs after transplantation of Tg(kdr1:GFP)  
1184 donor (D) into Tg(kdr1:mCherry) host (H) (top panels). Bottom panels- representative images of  
1185 ISVs after transplantation of Rab35A/B knockout donor cells from Tg(kdr1:GFP) line into  
1186 Tg(kdr1:mCherry) host. Red arrowheads indicate lumen failure. \*\*  $p < 0.01$ , NS=Non-Significant.  
1187 Error bars represent 95% confidence intervals. Insets are areas of higher magnification. All  
1188 experiments were done in triplicate.

1189  
1190  
1191  
1192  
1193

1194 SUPPLEMENTAL FIGURES  
1195

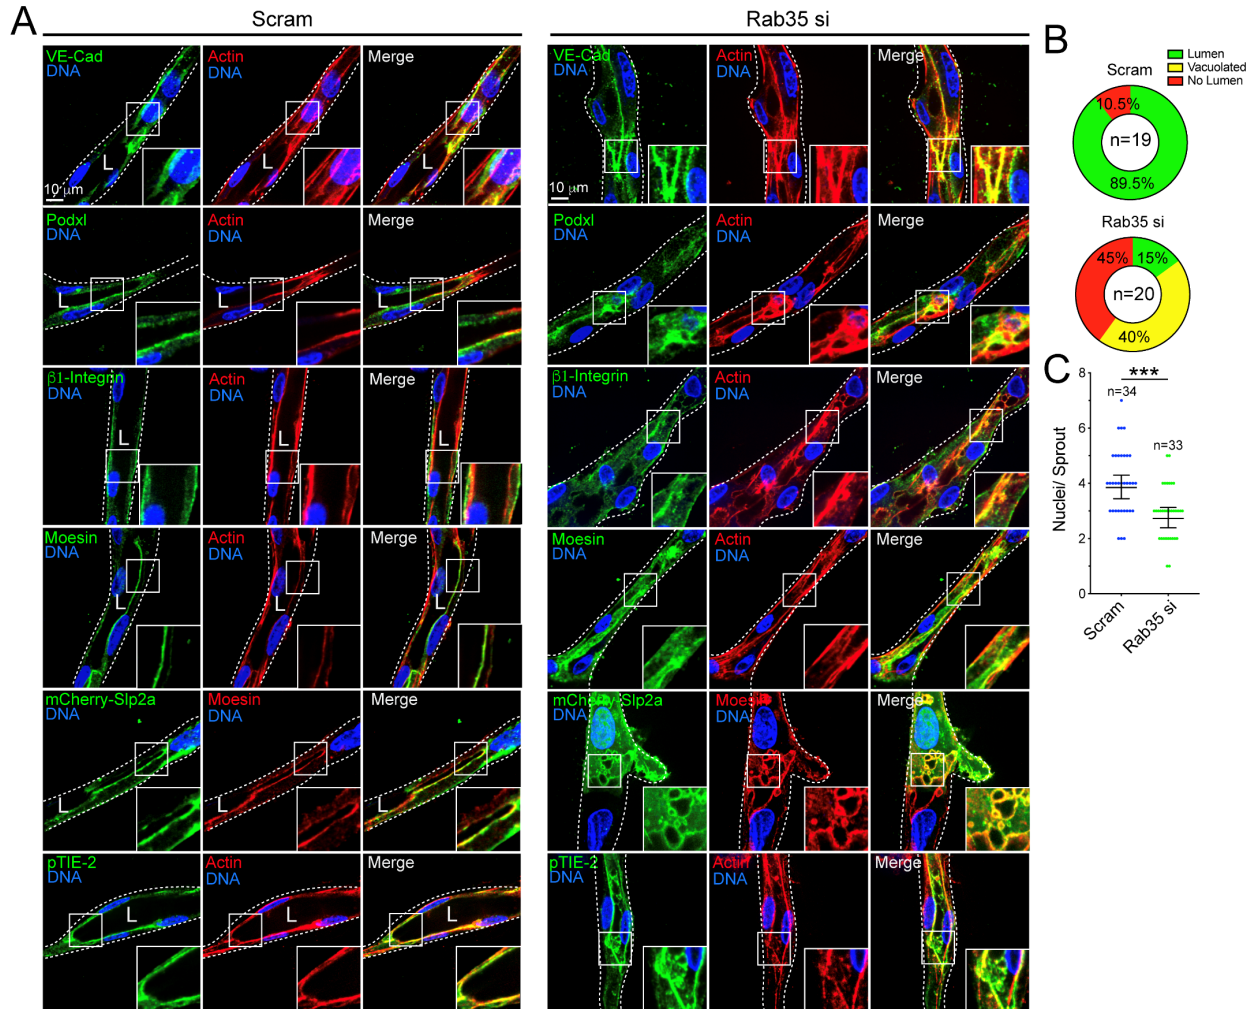

1196  
1197 **Supplemental Figure 1. Knockdown of Rab35 distorts cell apicobasal polarity.** (A) Scramble  
1198 (Scram) and Rab35 siRNA(si)-treated sprouts stained for VE-cadherin (VE-cad), podocalyxin  
1199 (Podxl),  $\beta$ 1-integrin, moesin or phosphorylated Tie2 (pTie2) apical and basal protein markers.  
1200 Apical marker synaptotagmin-like protein 2a (mCherry-Slp2a) was transduced into sprouts. L  
1201 denotes lumen and white dotted lines outline sprout exterior. (B) Quantification of lumen formation  
1202 in Scram and Rab35 siRNA-treated sprouts. Lumens were defined as an open continuous cavity.  
1203 Vacuolated sprouts were defined as sprouts lacking a contiguous lumen, while exhibiting an  
1204 excess of large vacuoles. The no lumen group was defined as sprouts that had no visible cavity  
1205 or vacuoles. N=number of sprouts. (C) Quantification of nuclei per sprout in Scram and Rab35  
1206 siRNA treated sprouts. \*\*\*  $p < 0.001$ . Error bars represent 95% confidence intervals. Insets are  
1207 areas of higher magnification. All experiments were done using Human umbilical vein endothelial  
1208 cells in triplicate.

1209  
1210  
1211  
1212  
1213

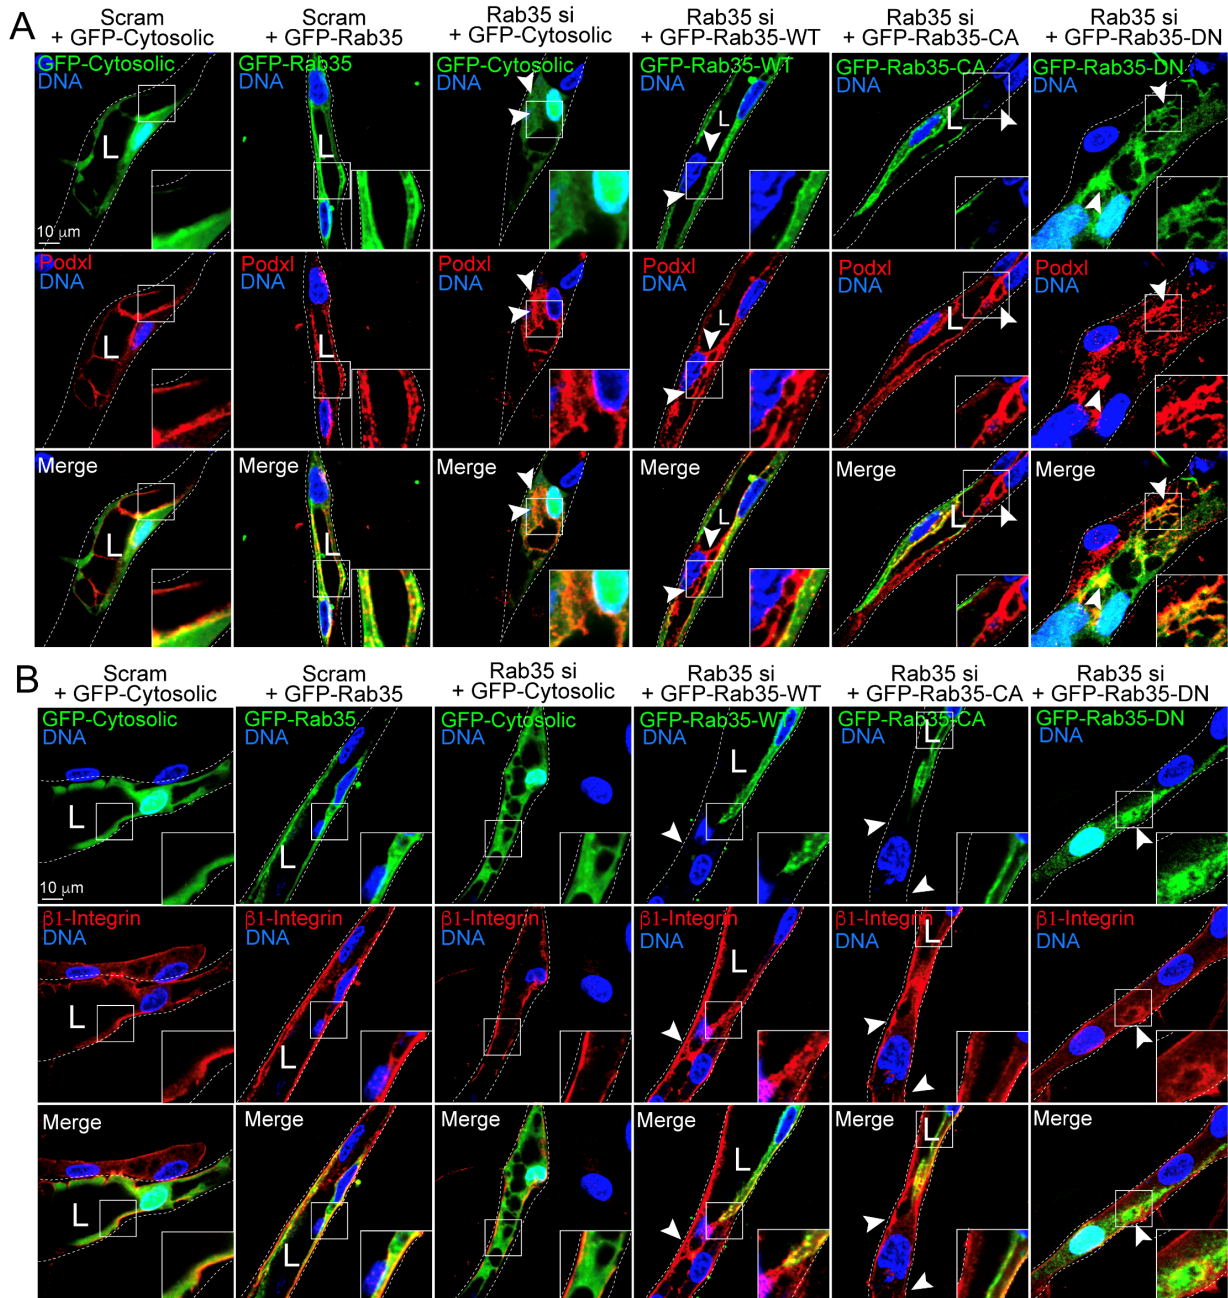

1214  
1215  
1216  
1217  
1218  
1219  
1220  
1221  
1222  
1223  
1224

**Supplemental Figure 2. Rab35 knockdown disrupts sprout polarity programs. (A,B)** Representative images of Rab35 knockdown (KD) sprouts transfected with cytosolic GFP or GFP-Rab35 wild type (WT), constitutively-active (CA) or dominant negative (DN) for rescues. Sprouts were also stained for apical marker podocalyxin (Podxl) or apical marker  $\beta$ 1-integrin. Arrowheads denote abnormal localization of podocalyxin or  $\beta$ 1-integrin. L denotes lumen in all images. White dotted lines mark sprout exterior. Insets are areas of higher magnification. All experiments were done using Human umbilical vein endothelial cells in triplicate.



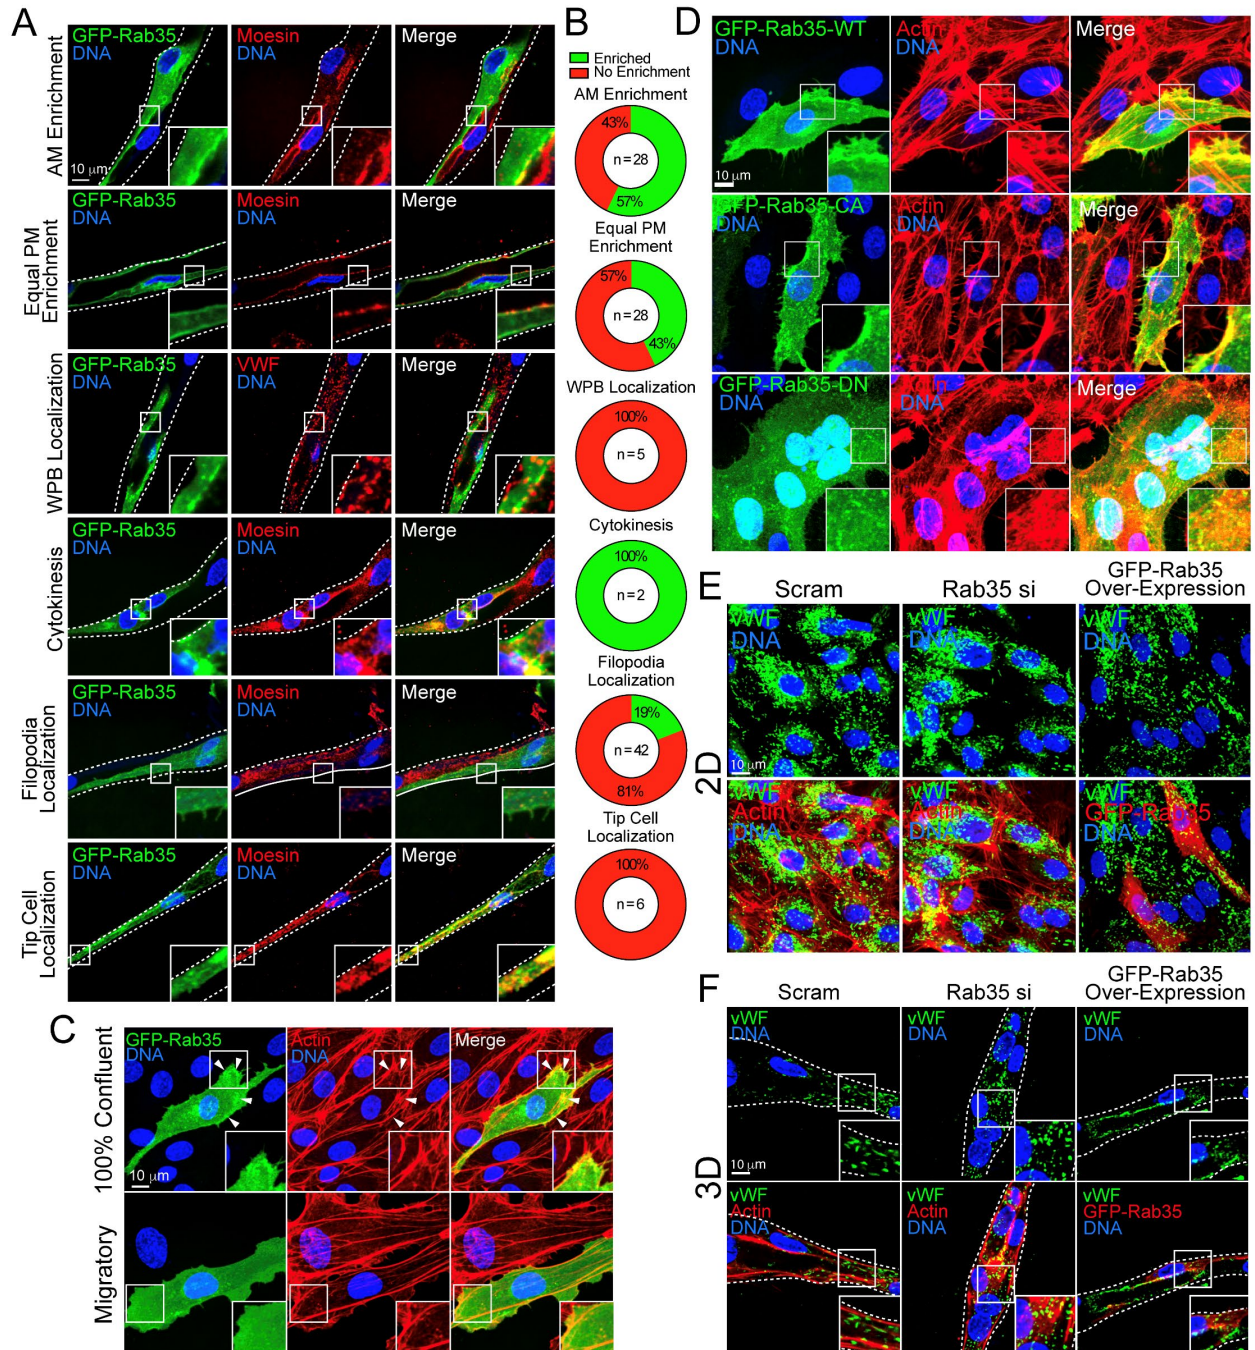

1225  
1226  
1227  
1228  
1229  
1230  
1231  
1232  
1233

**Supplemental Figure 3. Rab35 localizes to the plasma membrane and not to Weibel-Palade Bodies.** (A) Representative images of GFP-Rab35 localization binned by its proximity to the apical plasma membrane (AM), equal enrichment at the basal and apical plasma membrane (equal plasma membrane (PM) enrichment), Weibel-Palade bodies (WPBs), at sites of cytokinesis, filopodia, and most distal cell in the sprout (tip cell). Sprouts were also stained for moesin to mark the apical membrane. (B) Quantification of GFP-Rab35 enrichment with respect to the described conditions in panel A. (C) Representative images of GFP-Rab35 localization in

1234 2-dimensional culture stain for actin. The top panels are of a confluent monolayer and the bottom  
1235 panels are of migratory sub-confluent cells. Arrowheads indicate co-localization of actin and GFP-  
1236 Rab35. **(D)** Representative images of 2-dimensional localization of GFP-Rab35 wild type (WT,  
1237 top panels), constitutively active (CA, middle panels), and dominant negative (DN, bottom panels)  
1238 stained for actin. **(E)** Representative images of cells treated with scramble (Scram) or Rab35  
1239 siRNA (si) and stained for WPB marker von Willebrand Factor (vWF) and actin or overexpressing  
1240 GFP-Rab35. **(F)** Representative images of sprouts treated with Scram or Rab35 siRNA stained  
1241 for vWF and actin or expressing GFP-Rab35 in 3-dimensional (3D) sprouts. Insets are areas of  
1242 higher magnification. White dotted lines mark sprout exterior. All experiments were done using  
1243 Human umbilical vein endothelial cells in triplicate.

1244  
1245  
1246  
1247  
1248  
1249  
1250  
1251  
1252  
1253  
1254  
1255  
1256  
1257  
1258  
1259  
1260  
1261  
1262  
1263  
1264  
1265  
1266  
1267  
1268  
1269  
1270  
1271  
1272  
1273  
1274  
1275  
1276  
1277  
1278  
1279  
1280  
1281  
1282  
1283  
1284



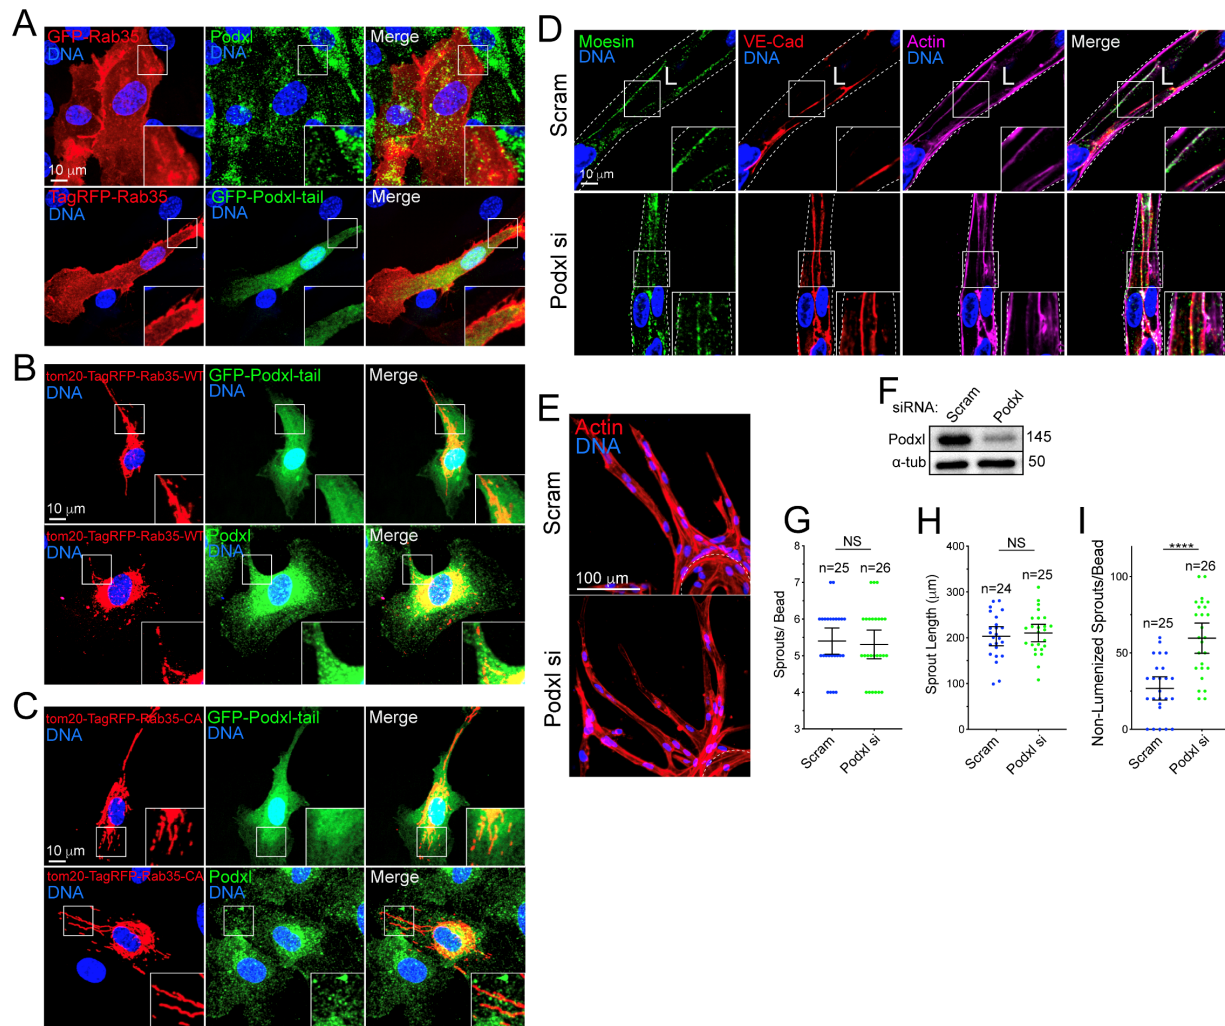

1285  
1286  
1287  
1288  
1289  
1290  
1291  
1292  
1293  
1294  
1295  
1296  
1297  
1298  
1299  
1300  
1301  
1302  
1303

**Supplemental Figure 4. Rab35 does not affect podocalyxin trafficking.** (A) Two-dimensional localization of GFP-Rab35 with podocalyxin (Podxl) (top panels) and GFP-Podxl-tail (bottom panels). (B). Top panels- cell co-expressing tom20-TagRFP-Rab35- wild type (WT) with GFP-Podxl-tail. Bottom panels- cell expressing tom20-TagRFP-Rab35-WT stained for endogenous podocalyxin. (C) Representative image of a cell co-expressing tom20-TagRFP-Rab35-constitutively active (CA) mutant with GFP-Podxl-tail. Bottom panels show a cell expressing tom20-tagRFP-Rab35-constitutively active (CA) mutant stained for endogenous podocalyxin. (D) Representative image of sprouts treated with scramble (Scram) or podocalyxin siRNA (si) and stained for moesin, VE-cadherin (VE-cad) and actin. L denotes lumen. White dotted lines mark sprout exterior. (E) Sprout morphology for the same conditions as D. (F) Confirmation of siRNA-mediated knockdown by western blot. (G-I) Quantification of indicated sprouting parameters across groups. \*\*\*\* p < 0.0001, NS=Non-Significant. Error bars represent 95% confidence intervals. Insets are areas of higher magnification. All experiments were done using Human umbilical vein endothelial cells in triplicate.

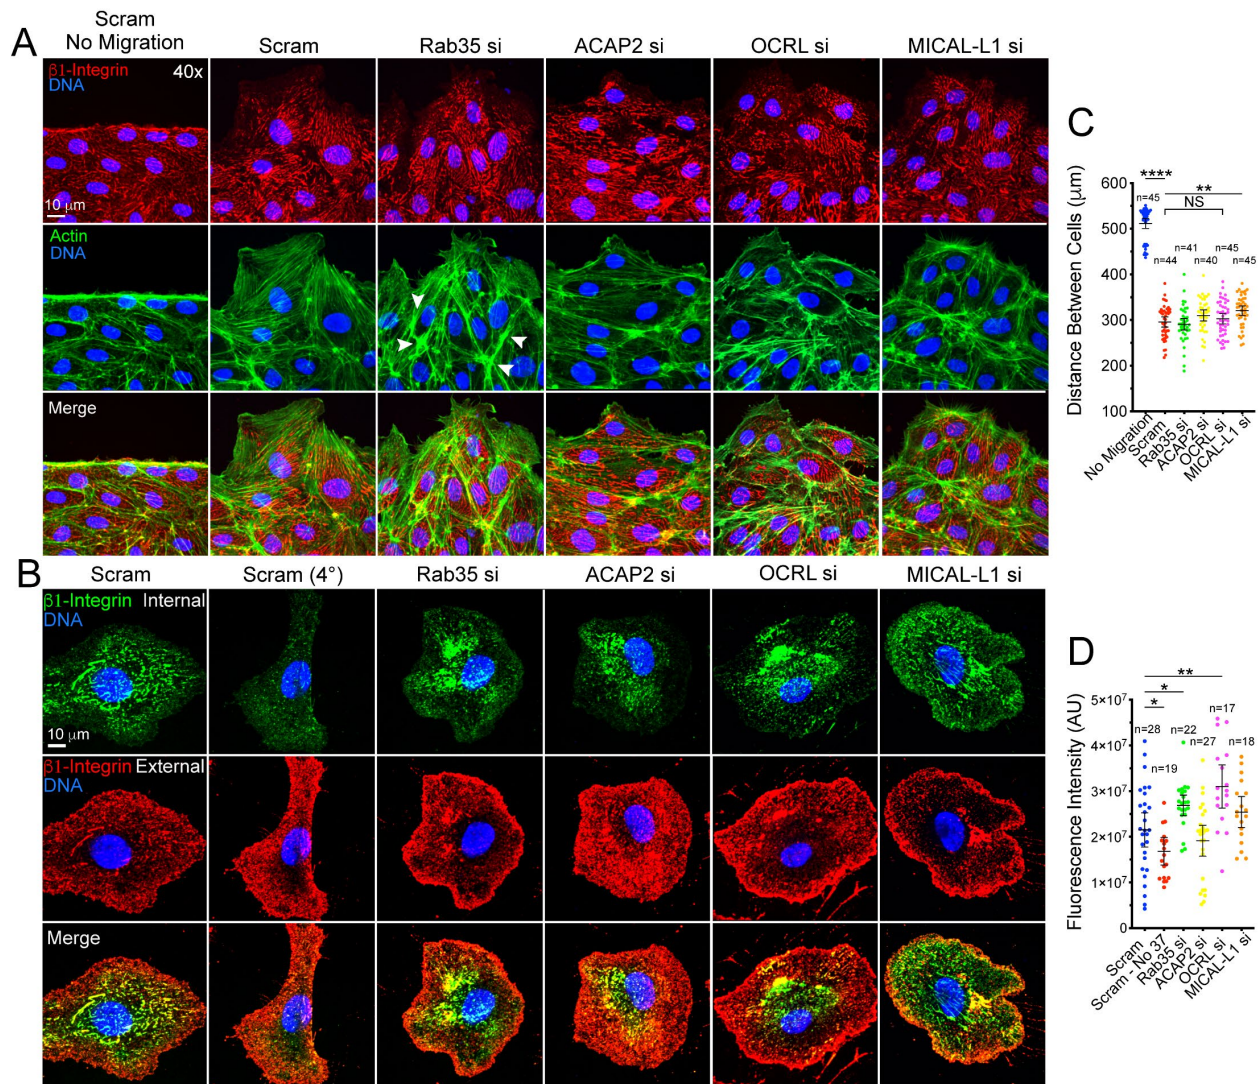

1304  
1305  
1306  
1307  
1308  
1309  
1310  
1311  
1312  
1313  
1314  
1315  
1316  
1317  
1318  
1319  
1320

**Supplemental Figure 5. Knockdown of Rab35 impacts integrin internalization, but not cell migration.** (A) Migration assay in cells treated with scramble (Scram), Rab35, ACAP2, OCRL, or MICAL-L1 siRNA (si). Cells were stained for  $\beta 1$ -integrin and actin. Arrowheads indicate abnormal actin architecture, namely elevated actin deposition. (B) Antibody feeding assay to test for integrin turnover between conditions. Cells were treated with indicated siRNA. Green channel represents internalized integrins, while the red channel marks only external integrins. As a control to inhibit endocytosis a group was held at 4°C. (C) Quantification for the migration assay in A. (D) Fluorescence intensity of internalized  $\beta 1$ -integrin in panel B. \*  $p < 0.05$ , \*\*  $p < 0.01$ , \*\*\*\*  $p < 0.0001$ , NS=Non-Significant. Error bars represent 95% confidence intervals. All experiments were done using Human umbilical vein endothelial cells in triplicate.



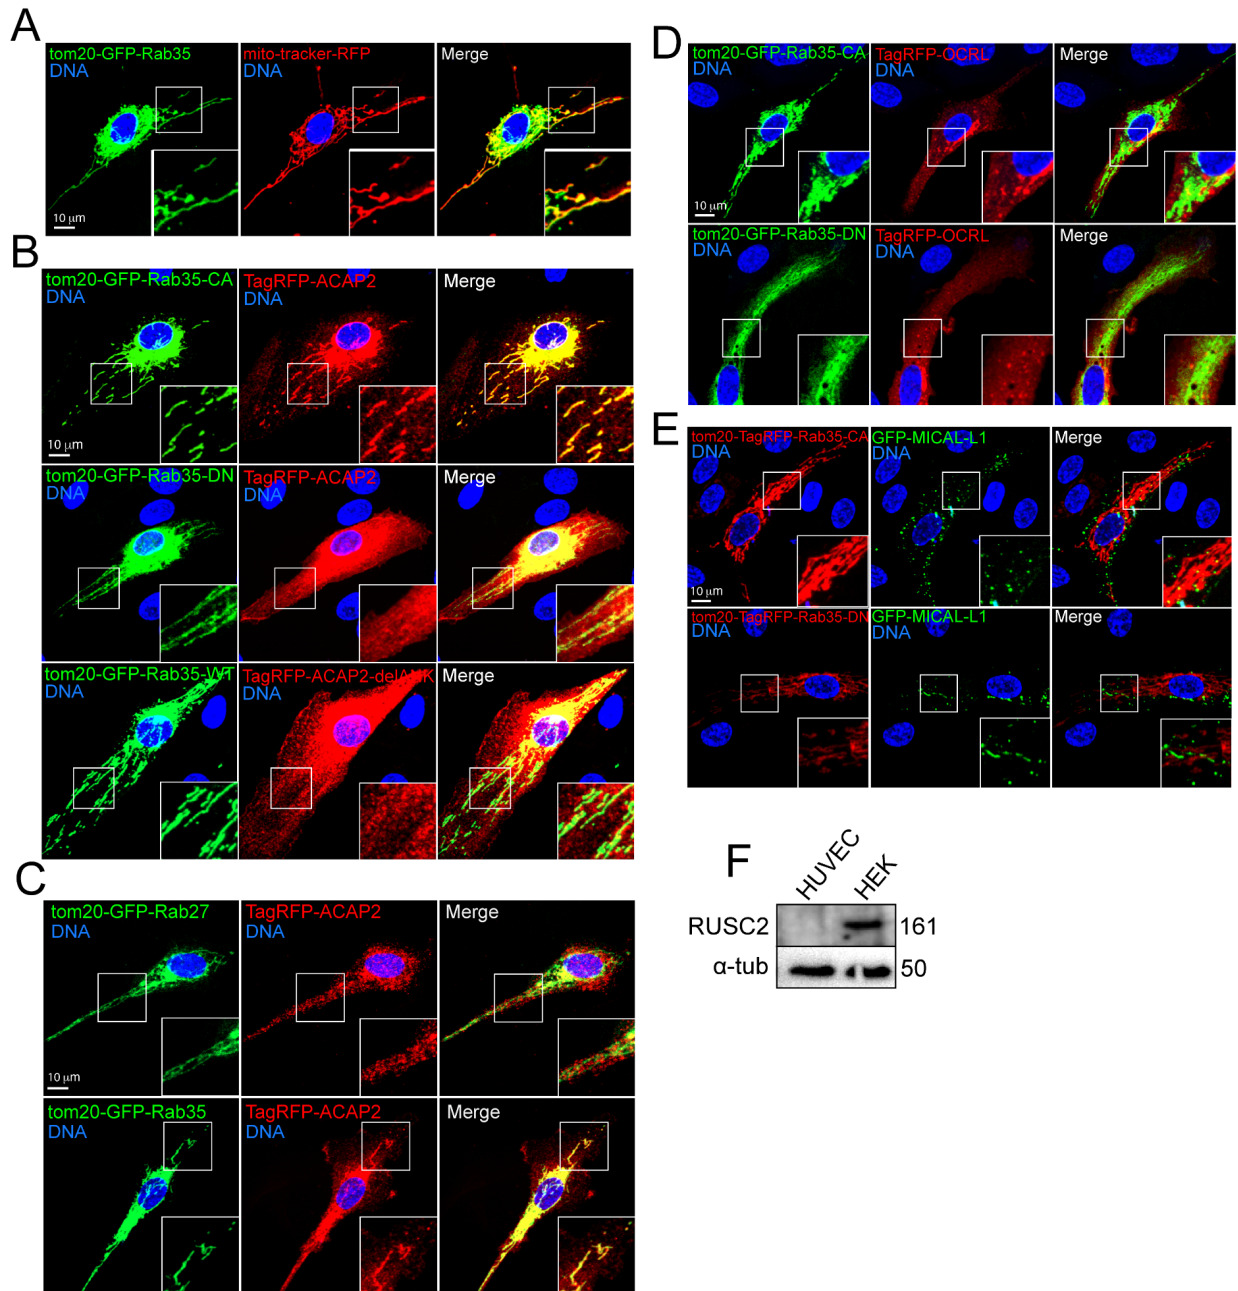

1321  
1322  
1323  
1324  
1325  
1326  
1327  
1328  
1329  
1330  
1331

**Supplemental Figure 6. Rab35 binds only ACAP2.** (A) Cells stained for mitochondria (Mito-tracker) and transfected with tom20-tagRFP-Rab35. (B) Representative images of a cell co-expressing tom20-tagRFP-Rab35-wild type (WT), constitutively active (CA), or dominant negative (DN) variants with TagRFP-ACAP2 or ACAP2 with deleted ankyrin repeat domain (delANK). (C) Representative image of a cell expressing tagRFP-ACAP2 and tom20-GFP-Rab27-WT (top panels). Bottom panel is a representative image of a cell expressing of tom20-GFP-Rab35-WT with tagRFP-ACAP2. (D) Top panels- representative image of a cell expressing tom20-GFP-Rab35-CA and OCRL. Bottom panels- cell expressing tom20-GFP-Rab35-DN and TagRFP-OCRL. (E) Top panels- representative image of a cell expressing tom20-TagRFP-Rab35-CA and

1332 GFP-MICAL-L1. Bottom panels- cell expressing tom20-TagRFP-Rab35-DN and GFP-MICAL-L1.  
1333 **(F)** Western blot image probing for RUSC2 in both HEK293 cells and Human umbilical vein  
1334 endothelial cells (HUVECs). Insets are areas of higher magnification. All experiments were done  
1335 using Human umbilical vein endothelial cells in triplicate.

1336  
1337  
1338  
1339  
1340  
1341  
1342  
1343  
1344  
1345  
1346  
1347  
1348  
1349  
1350  
1351  
1352  
1353  
1354  
1355  
1356  
1357  
1358  
1359  
1360  
1361  
1362  
1363  
1364  
1365  
1366  
1367  
1368  
1369  
1370  
1371  
1372  
1373  
1374  
1375  
1376  
1377  
1378  
1379  
1380  
1381  
1382

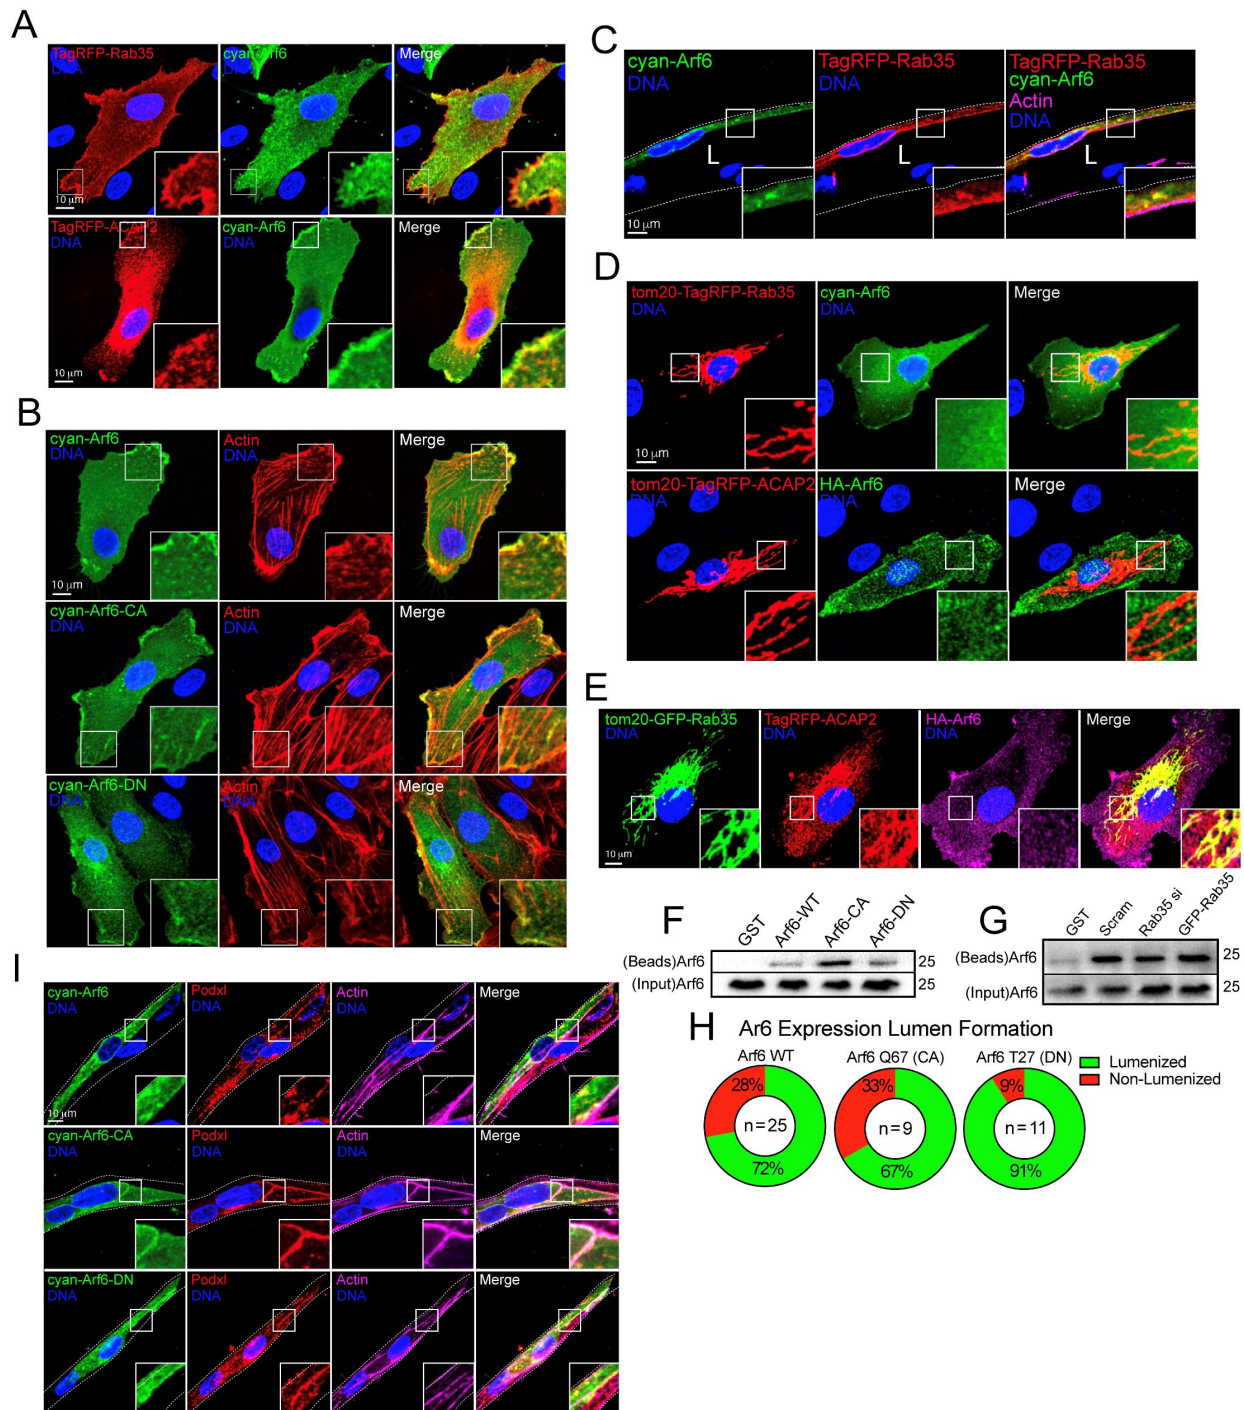

1383  
 1384  
 1385  
 1386  
 1387  
 1388  
 1389

**Supplemental Figure 7. Rab35 does not affect Arf6 activity in endothelial cells.** (A) Two-dimensional localization of cyan-Arf6 with tagRFP-Rab35 (top panels) and ACAP2 (bottom panels). (B) Two-dimensional localization of cyan-Arf6- wild type (WT, top panels), constitutively active (CA, middle panels), and dominant negative (DN, bottom panels) stained for actin. (C) Localization of tag-RFP-Rab35 and cyan-Arf6 in a sprout. (D) Top panel- representative image of

1390 a cell expressing tom20-tagRFP-Rab35 and cyan-Arf6. Bottom panel- representative image of a  
1391 cell expressing tom20-tagRFP-ACAP2 and HA-Arf6. (E) Representative image of a cell  
1392 expressing tom20-GFP-Rab35, tagRFP-ACAP2 and HA-Arf6. (F) Pulldown assay using GGA3 to  
1393 probe for activated Arf6. Cells were transfected with WT, CA, or DN Arf6. (G) Pulldown assay  
1394 using GGA3 to probe for activated Arf6. Cells were treated with scramble (Scram) and Rab35  
1395 siRNA (si) or transfected with GFP-Rab35. (H) Quantification of open or collapsed lumens after  
1396 transfection with WT, CA, or DN cyan-Arf6. N= number of sprouts. (I) Representative images of  
1397 sprouts transduced with WT, CA, or DN cyan-Arf6 stained for Podocalyxin (Podxl) and actin. L  
1398 denotes lumen in all images. White dotted lines mark sprout exterior. Insets are areas of higher  
1399 magnification. All experiments were done using Human umbilical vein endothelial cells in  
1400 triplicate.

1401  
1402  
1403  
1404  
1405  
1406  
1407  
1408  
1409  
1410  
1411  
1412  
1413  
1414  
1415  
1416  
1417  
1418  
1419  
1420  
1421  
1422  
1423  
1424  
1425  
1426  
1427  
1428  
1429  
1430  
1431  
1432  
1433  
1434  
1435  
1436  
1437  
1438  
1439  
1440



1441  
1442  
1443  
1444

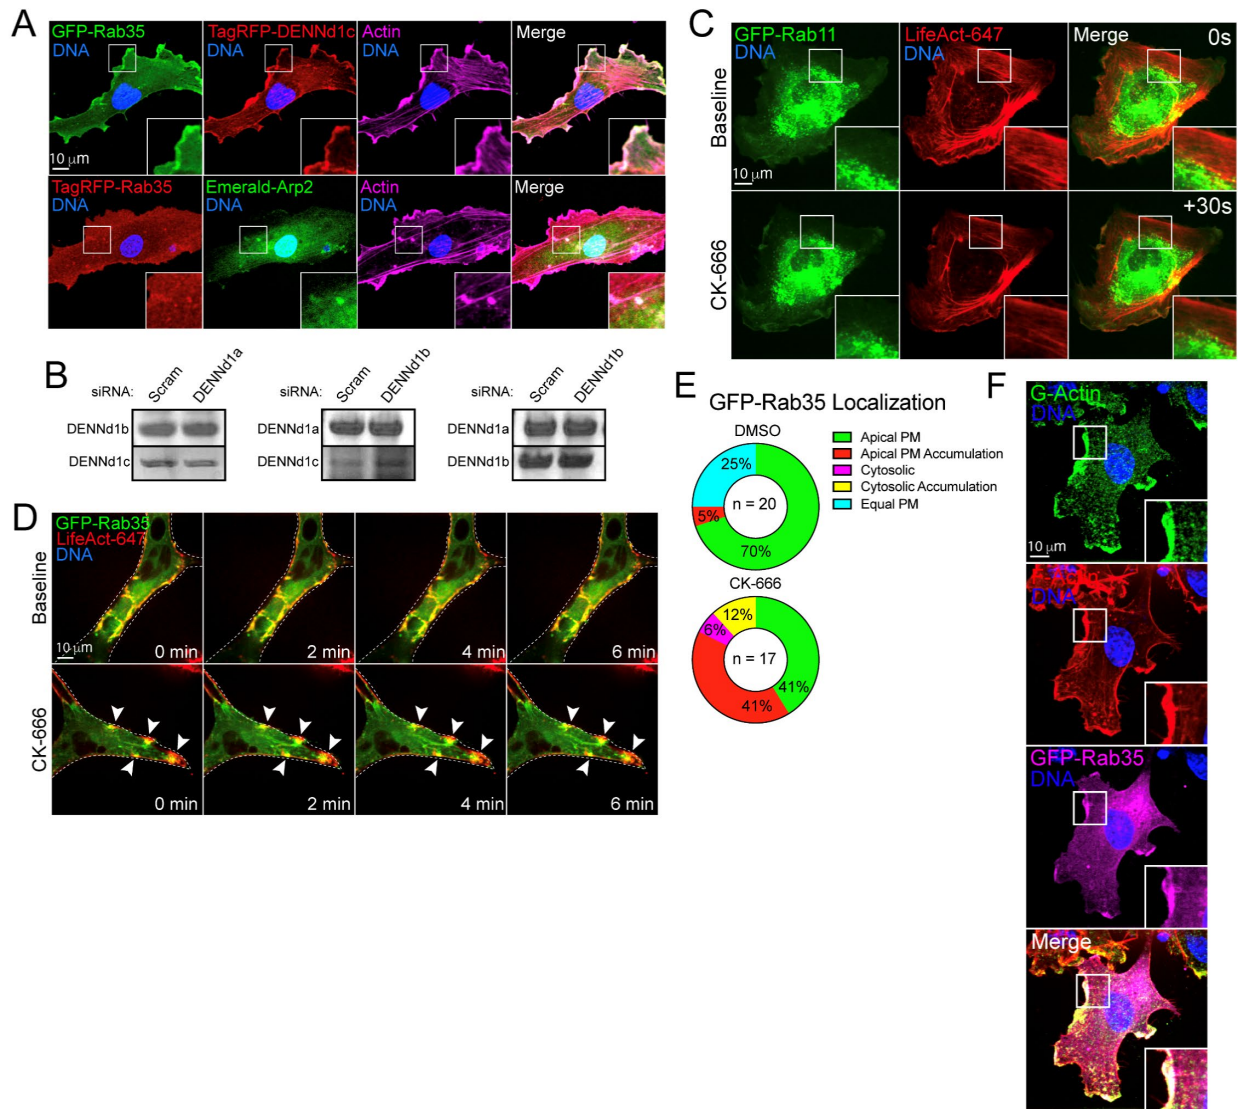

1445  
1446  
1447  
1448  
1449  
1450  
1451  
1452  
1453  
1454  
1455  
1456  
1457

**Supplemental Figure 8. Rab35 is recruited to sites of active actin polymerization. (A)** Top panel- representative image of a cell expressing GFP-Rab35 and tagRFP-DENNd1c. Bottom panel- representative image of a cell expressing GFP-Rab35 and Emerald-Arp2. **(B)** Western blot of DENNd1a-c knockdown. For each blot a DENNd1 was knocked down and the remaining two DENND1s were probed for to test for compensation effects. **(C)** Representative live-image of a cell expressing GFP-Rab11 and TagRFP647 (647)-LifeAct before and after CK-666 treatment. **(D)** GFP-Rab35 and LifeAct-647 co-expression in sprout live-imaged at baseline and following treatment with CK-666. Arrowheads indicate accumulations of GFP-Rab35 and LifeAct-647. Dotted line indicates sprout exterior. **(E)** Quantification of GFP-Rab35 localization upon DMSO (vehicle) or CK-666 administration. Apical plasma membrane (PM, uniformly localized to apical membrane), apical PM accumulation (Rab35 puncta at the apical membrane), cytosolic (localized

1458 in the cytoplasm), cytosolic accumulations (Rab35 puncta in the cytoplasm), equal PM (Rab35  
1459 equally distributed between the apical and basal membranes). Two-dimensional localization of  
1460 GFP-Rab35 with globular-actin and filamentous-actin. **(F)** Representative image of a cell  
1461 expressing GFP-Rab35 and stained for filamentous (F) and globular (G) actin. Insets are areas  
1462 of higher magnification. All experiments were done using Human umbilical vein endothelial cells  
1463 in triplicate.  
1464  
1465  
1466

1467 **MOVIE FIGURE LEGENDS**

1468

1469 **Movie 1.** Sprout expressing GFP-Rab35. L denotes lumen.

1470

1471 **Movie 2.** Sprout expressing GFP-Rab35 and LifeAct-TagRFP647 (FarRed) treated with  
1472 scrambled siRNA. L denotes lumen.

1473

1474 **Movie 3.** Sprout expressing GFP-Rab35 and LifeAct-TagRFP647 (FarRed) treated with  
1475 DENNd1c siRNA. L denotes lumen. Arrow marks actin accumulation.

1476

1477 **Movie 4.** Sprout expressing GFP-Rab35 and LifeAct-TagRFP647 (FarRed) treated with DMSO.  
1478 Arrow marks normal actin buttressing at junctions.

1479

1480 **Movie 5.** Sprout expressing GFP-Rab35 and LifeAct-TagRFP647 (FarRed) treated with CK-  
1481 666. Arrow marks actin accumulations.

1482

1483 **Movie 6.** Cell expressing TagRFP-Rab35 and GFP-LifeAct before and after CK-666 treatment.

1484

1485 **Movie 7.** Cell expressing TagRFP-DENNd1c and GFP-LifeAct before and after CK-666  
1486 treatment.

1487

1488 **Movie 8.** Cell expressing mCherry-Arp2 and GFP-Rab35 before and after CK-666 treatment.

1489

1490 **Movie 9.** Cell expressing GFP-Rab35, LifeAct-TagRFP647 (FarRed), and ligand-modulated  
1491 antibody fragments targeted to the mitochondria (mito-LAMA) before and after trimethoprim  
1492 (TMP) administration.

1493

1494

1495 **Movie 10.** Cell expressing GFP-Rab35, mCherry-Arp2, and ligand-modulated antibody  
1496 fragments targeted to the mitochondria (mito-LAMA) before and after trimethoprim (TMP)  
1497 administration.

1498

1499 **Movie 11.** Cell expressing GFP-Rab35, TagRFP-DENNd1c, and ligand-modulated antibody  
1500 fragments targeted to the mitochondria (mito-LAMA) before and after trimethoprim (TMP)  
1501 administration.

1502

1503 **Movie 12.** Cell expressing GFP-Rab35, mCherry-Arp2, and ligand-modulated antibody  
1504 fragments targeted to the mitochondria (mito-LAMA) before and after trimethoprim (TMP)  
1505 administration. After TMP treatment cell were also treated with CK-666.

1506

1507 **Movie 13.** DENNd1c knockdown (siRNA) cell expressing GFP-Rab35, mCherry-Arp2, and  
1508 ligand-modulated antibody fragments targeted to the mitochondria (mito-LAMA) before and after  
1509 trimethoprim (TMP) administration.

1510 **MAJOR RESOURCE TABLE**

| <b>Reagent</b>                                  | <b>Vendor</b>                | <b>Catalog #</b> |
|-------------------------------------------------|------------------------------|------------------|
| OPTI-MEM 1 Reduced Serum Medium, no phenol red  | ThermoFisher                 | 31985070         |
| Polyethyleneamine Branched (PEI)                | Sigma-Aldrich                | 408727           |
| Chloroquine Diphosphate Crystalline (CQ)        | Sigma-Aldrich                | C6628-25G        |
| Endothelial Cell Growth Medium 2                | PromoCell                    | C-22011          |
| DMEM, High Glucose, with L-Glutamine            | Genesee Scientific           | 25-500           |
| GenClone Fetal Bovine Serum (FBS)               | Genesee Scientific           | 25-514           |
| Penicillin-Streptomycin 100X Solution           | Genesee Scientific           | P4333-100ML      |
| DPBS, no Calcium, no Magnesium                  | ThermoFisher                 | 14190250         |
| Trypsin-EDTA, 0.25% 1X, phenol red              | Genesee Scientific           | 25-510           |
| Paraformaldehyde 20% Aqueous Sol. EM Grade      | Electron Microscopy Sciences | 15713            |
| BSA Lyophilized Powder, Fraction V              | Genesee Scientific           | 25-529           |
| Cytoskeleton G actin/ F actin In Vivo Assay Kit | Cytoskeleton, Inc.           | BK037-BK037      |
| Culture-Insert 2 Well in $\mu$ -Dish 35         | Ibidi                        | 81176            |
| Dimethyl Sulfoxide (DMSO)                       | Sigma-Aldrich                | D2650-5X10ML     |
| Silencer™ Negative Control No. 1 siRNA          | ThermoFisher                 | AM4611           |
| Rab35 siRNA                                     | ThermoFisher                 | siRNA ID: s21709 |
| ACAP2 siRNA                                     | ThermoFisher                 | siRNA ID: s24011 |
| OCRL siRNA                                      | ThermoFisher                 | siRNA ID: s9819  |
| MICAL-L1 siRNA                                  | Thermo Scientific            | siRNA ID: s39940 |

|                                              |                                   |                  |
|----------------------------------------------|-----------------------------------|------------------|
| RUSC2 siRNA                                  | Thermo Scientific                 | siRNA ID: s19070 |
| Podxl siRNA                                  | Thermo Scientific                 | siRNA ID: s10771 |
| DENNd1a                                      | Thermo Scientific                 | siRNA ID: s33637 |
| DENNd1b                                      | Thermo Scientific                 | siRNA ID: s29140 |
| DENNd1c                                      | Thermo Scientific                 | siRNA ID: s36719 |
| Cytodex Microcarrier Beads                   | Sigma-Aldrich                     | C3275-10G        |
| CK-666                                       | Sigma-Aldrich                     | SML0006-5MG      |
| Trimethoprim (TMP)                           | Sigma-Aldrich                     | T7883-5G         |
| NP-G2-044 (Fascin Inhibitor)                 | Selleck Chem                      | S2962            |
| GGA3 PBD-Beads                               | Cytoskeleton, Inc.                | GGA07-A          |
| High Capacity Reverse Transcription Kit      | ThermoFisher                      | 4368814          |
| Fibrinogen Type 1-S from Bovine Plasma       | Sigma-Aldrich                     | F8630-1G         |
| Thrombin from Bovine Plasma                  | Sigma-Aldrich                     | T7513-500UN      |
| Aprotinin Protease Inhibitor                 | ThermoFisher                      | 78432            |
| Phenol-Red (Zebrafish Injection Mixture)     | Avantor/ VWR                      | 34487-61-1       |
| CRIPSR gRNA                                  | Integrated DNA Technologies (IDT) |                  |
| Alt-R® S.p. Cas9 Nuclease V3, 100 µg         | Integrated DNA Technologies (IDT) | 1081058          |
| CellTracker Deep Red                         | ThermoFisher                      | M22426           |
| 3-Aminobenzoic Acid Ethyl Ester (Tricaine)   | Sigma-Aldrich                     | A5040-25G        |
| Latex Beads, Polystyrene Carboxylate Mod     | Sigma-Aldrich                     | L3280-1ML        |
| Dynabeads™ Protein G for Immunoprecipitation | ThermoFisher                      | 10003D           |
| MitoTracker DeepRed                          | ThermoFisher                      | M22426           |
| Trizol Reagent                               | ThermoFisher                      | 15596026         |



|                                  |               |            |
|----------------------------------|---------------|------------|
| Chloroform                       | Sigma-Aldrich | 288306     |
| MEGAscript™ T3 Transcription Kit | ThermoFisher  | AM1338     |
| BCA Protein Assay Kit            | ThermoFisher  | 23225      |
| NHLF                             | Lonza         | CC-2512    |
| HEK 293-A                        | ThermoFisher  | R70507     |
| Microcarrier beads               | Amersham      | 17-0485-01 |
| Protease inhibitor cocktail      | GoldBio       | GB-334-20  |
| Agarose Resin                    | GoldBio       | G-250-G    |
| Fura Red™, AM, cell permeant     | ThermoFisher  | F3020      |

1511  
1512  
1513  
1514

#### ANTIBODIES

| Target Antigen | Vendor or Source | Catalog No./ Clone | Working Concentration          |
|----------------|------------------|--------------------|--------------------------------|
| Rab35          | ThermoFisher     | PA531674           | 1:500 (WB)                     |
| ACAP2          | ThermoFisher     | PA557069           | 1:500 (WB)                     |
| OCRL           | ThermoFisher     | PA527844           | 1:200 (WB)                     |
| MICAL-L1       | ThermoFisher     | PA5107177          | 1:200 (WB)                     |
| RUSC2          | ThermoFisher     | PA572752           | 1:200 (WB)                     |
| Arf6           | Santa Cruz       | sc-7971            | 1:200 (WB)                     |
| Myc-tag        | ThermoFisher     | 132500             | 1:1000 (IHC)                   |
| HA-tag         | ThermoFisher     | 26183              | 1:1000 (IHC)                   |
| cyan           | Bio-Rad          | AHP2986            | 1:1000 (IHC)                   |
| Alpha-tubulin  | Abcam            | ab52866            | 0.0648ug/mL<br>(1:10,000) (WB) |

|                                                                  |               |                  |                               |
|------------------------------------------------------------------|---------------|------------------|-------------------------------|
| GAPDH                                                            | ThermoFisher  | PA1988           | 1:1000 (WB)                   |
| Moesin                                                           | Abcam         | ab52490          | 0.05ug/mL<br>(1:1000) (IHC)   |
| VE-Cadherin                                                      | ThermoFisher  | 14-1441-82       | 0.5ug/mL<br>(1:1000) (IHC)    |
| Podocalyxin                                                      | R&D           | AF1658           | 15ug/mL (1:200)<br>(WB & IHC) |
| Von Willebrand Factor                                            | Abcam         | ab6994           | 10ug/mL<br>(1:1000) (IHC)     |
| $\beta$ 1-Integrin                                               | Abcam         | ab30394          | 1:500 (IHC)                   |
| Phosphorylated TIE-2/TEK (Tyr992)                                | Sigma Aldrich | ABF131           | 0.25 ug/mL<br>(1:500) (IHC)   |
| Anti-HA-Tag, Rabbit Monoclonal                                   | Sigma-Aldrich | SAB5600116-100UG | 5ug/mL                        |
| Alexa Fluor™ 488 Phalloidin                                      | ThermoFisher  | A12379           | 1 uM (1:200)                  |
| Alexa Fluor™ 647 Phalloidin                                      | ThermoFisher  | A22287           | 1 uM (1:200)                  |
| Alexa Fluor™ 555 Phalloidin                                      | ThermoFisher  | A34055           | 1 uM (1:200)                  |
| Goat anti-Rabbit IgG (H+L) Secondary Antibody, Alexa Fluor 488   | ThermoFisher  | A11008           | 1ug/mL (1:500)                |
| Donkey anti-Rabbit IgG (H+L) Secondary Antibody, Alexa Fluor 555 | ThermoFisher  | A31572           | 1ug/mL (1:500)                |
| Donkey anti-goat IgG (H+L) Secondary Antibody, Alexa Flour 488   | ThermoFisher  | A11055           | 1ug/mL (1:500)                |

|                                                                                  |                    |        |                |
|----------------------------------------------------------------------------------|--------------------|--------|----------------|
| Donkey anti-Goat IgG (H+L) Cross-Adsorbed Secondary Antibody, Alexa Fluor 555    | ThermoFisher       | A21432 | 1ug/mL (1:500) |
| Chicken anti-Rabbit IgG (H+L) Cross-Adsorbed Secondary Antibody, Alexa Fluor 647 | ThermoFisher       | A21443 | 1ug/mL (1:500) |
| Goat Anti-Rabbit HRP                                                             | Genesee Scientific | 20-303 | 1ug/mL (1:500) |

1515  
1516  
1517  
1518  
1519

#### OLIGOS AND SGRNA

| Name         | Sequence                      | Function          |
|--------------|-------------------------------|-------------------|
| Rab35a crRNA | CCATCGGTGTGGACTTCAAG          | sgRNA Target      |
| Rab35b crRNA | CTATAGGAGTCGACTTCAAG          | sgRNA Target      |
| Rab35a_seqF  | GCCAATCAGATTCGAGATCCAG<br>AC  | Sequencing Primer |
| Rab35a_seqR  | CACTCACGTGGAGGTGATTGTCC<br>TG | Sequencing Primer |
| Rab35b_seqF  | CACGCATAGTTCAATGGTGTGTG       | Sequencing Primer |
| Rab35b_seqR  | GCACACCCCTATCATGACACTAC<br>TC | Sequencing Primer |

1520  
1521  
1522  
1523
